# Supplementary material for: Molecular surveillance of zoonotic pathogens from wild rodents in the Republic of Korea
Source: PubMed Central journal article supplement (PMC11257403; doi:10.1371/journal.pntd.0012306), 2024-07-08
Supplement: pntd.0012306.s002.pdf [file pntd.0012306.s002.pdf]

# PLOS Neglected Tropical Diseases

## Molecular surveillance of zoonotic pathogens from wild rodents in the Republic of Korea

--Manuscript Draft--

|                                                                                         |                                                                                                                                                                                                                                                                                                                                                                                                                                                                                                                                                                                                                                                                                                                                                                                                                                                                                                                                                                                                                                                                                                                                                                                                                                                                                                                                                                                                                                                                                                                                                                                                                                                                                                                                                                                                                                                                                                                                                                                                                                                                                                                                                                                                                                                                                                           |
|-----------------------------------------------------------------------------------------|-----------------------------------------------------------------------------------------------------------------------------------------------------------------------------------------------------------------------------------------------------------------------------------------------------------------------------------------------------------------------------------------------------------------------------------------------------------------------------------------------------------------------------------------------------------------------------------------------------------------------------------------------------------------------------------------------------------------------------------------------------------------------------------------------------------------------------------------------------------------------------------------------------------------------------------------------------------------------------------------------------------------------------------------------------------------------------------------------------------------------------------------------------------------------------------------------------------------------------------------------------------------------------------------------------------------------------------------------------------------------------------------------------------------------------------------------------------------------------------------------------------------------------------------------------------------------------------------------------------------------------------------------------------------------------------------------------------------------------------------------------------------------------------------------------------------------------------------------------------------------------------------------------------------------------------------------------------------------------------------------------------------------------------------------------------------------------------------------------------------------------------------------------------------------------------------------------------------------------------------------------------------------------------------------------------|
| <b>Manuscript Number:</b>                                                               | PNTD-D-23-00918                                                                                                                                                                                                                                                                                                                                                                                                                                                                                                                                                                                                                                                                                                                                                                                                                                                                                                                                                                                                                                                                                                                                                                                                                                                                                                                                                                                                                                                                                                                                                                                                                                                                                                                                                                                                                                                                                                                                                                                                                                                                                                                                                                                                                                                                                           |
| <b>Full Title:</b>                                                                      | Molecular surveillance of zoonotic pathogens from wild rodents in the Republic of Korea                                                                                                                                                                                                                                                                                                                                                                                                                                                                                                                                                                                                                                                                                                                                                                                                                                                                                                                                                                                                                                                                                                                                                                                                                                                                                                                                                                                                                                                                                                                                                                                                                                                                                                                                                                                                                                                                                                                                                                                                                                                                                                                                                                                                                   |
| <b>Short Title:</b>                                                                     | Detection of rodent-borne pathogens in the Republic of Korea                                                                                                                                                                                                                                                                                                                                                                                                                                                                                                                                                                                                                                                                                                                                                                                                                                                                                                                                                                                                                                                                                                                                                                                                                                                                                                                                                                                                                                                                                                                                                                                                                                                                                                                                                                                                                                                                                                                                                                                                                                                                                                                                                                                                                                              |
| <b>Article Type:</b>                                                                    | Research Article                                                                                                                                                                                                                                                                                                                                                                                                                                                                                                                                                                                                                                                                                                                                                                                                                                                                                                                                                                                                                                                                                                                                                                                                                                                                                                                                                                                                                                                                                                                                                                                                                                                                                                                                                                                                                                                                                                                                                                                                                                                                                                                                                                                                                                                                                          |
| <b>Keywords:</b>                                                                        | Republic of Korea; rodents; rodent-borne pathogens; surveillance; zoonosis                                                                                                                                                                                                                                                                                                                                                                                                                                                                                                                                                                                                                                                                                                                                                                                                                                                                                                                                                                                                                                                                                                                                                                                                                                                                                                                                                                                                                                                                                                                                                                                                                                                                                                                                                                                                                                                                                                                                                                                                                                                                                                                                                                                                                                |
| <b>Abstract:</b>                                                                        | <p><b>Background</b></p> <p>Rodents are recognized as major reservoirs of numerous zoonotic pathogens and are involved in the transmission and maintenance of infectious diseases. Most importantly, despite their importance, diseases transmitted by rodents have been neglected. To date, there have been limited epidemiological studies on rodents and their information is still scarce in the Republic of Korea (ROK).</p> <p><b>Methodology/Principal findings</b></p> <p>We investigated rodent-borne pathogens by PCR/RT-PCR from 156 rodents, including 151 <i>Apodemus agrarius</i> and 5 <i>Rattus norvegicus</i> collected from 27 regions in eight provinces across the ROK between March 2019 and November 2020. Spleen, kidney, and blood samples were used for detecting <i>Anaplasma phagocytophilum</i>, <i>Bartonella</i> spp., <i>Borrelia burgdorferi</i> sensu lato group, <i>Coxiella burnetii</i>, <i>Leptospira interrogans</i>, and severe fever with thrombocytopenia syndrome virus (SFTSV). Of the 156 rodents, 73 (46.8%) were infected with <i>Bartonella</i> spp., 25 (16.0%) with <i>C. burnetii</i>, 24 (15.4%) with <i>L. interrogans</i>, 21 (13.5%) with <i>A. phagocytophilum</i>, 9 (5.8%) with SFTSV, and 5 (3.2%) with <i>Borrelia afzelii</i>. Co-infections with two and three pathogens were detected in 33 (21.1%) and 11 rodents (7.1%), respectively. <i>A. phagocytophilum</i> was detected in all regions, with a widespread occurrence in the ROK. The infection rates of <i>Bartonella</i> spp. were 83.3% for <i>B. grahamii</i> and 16.7% for <i>B. taylorii</i>.</p> <p><b>Conclusions/Significance</b></p> <p>To our best knowledge, this is the first report of <i>C. burnetii</i> and SFTSV infections in rodents in the ROK. Our study also provides the first description of various rodent-borne pathogens through an extensive epidemiological survey in the ROK. Our results suggest that rodents harbor various pathogens, posing a potential threat to public health. Altogether, this study provides useful information on the occurrence and distribution of zoonotic pathogens disseminated among rodents and emphasizes the urgent need for rapid diagnosis, prevention, and control strategies toward these zoonotic diseases.</p> |
| <b>Additional Information:</b>                                                          |                                                                                                                                                                                                                                                                                                                                                                                                                                                                                                                                                                                                                                                                                                                                                                                                                                                                                                                                                                                                                                                                                                                                                                                                                                                                                                                                                                                                                                                                                                                                                                                                                                                                                                                                                                                                                                                                                                                                                                                                                                                                                                                                                                                                                                                                                                           |
| <b>Question</b>                                                                         | <b>Response</b>                                                                                                                                                                                                                                                                                                                                                                                                                                                                                                                                                                                                                                                                                                                                                                                                                                                                                                                                                                                                                                                                                                                                                                                                                                                                                                                                                                                                                                                                                                                                                                                                                                                                                                                                                                                                                                                                                                                                                                                                                                                                                                                                                                                                                                                                                           |
| <b>Government Employee</b>                                                              | No - No authors are employees of the U.S. government.                                                                                                                                                                                                                                                                                                                                                                                                                                                                                                                                                                                                                                                                                                                                                                                                                                                                                                                                                                                                                                                                                                                                                                                                                                                                                                                                                                                                                                                                                                                                                                                                                                                                                                                                                                                                                                                                                                                                                                                                                                                                                                                                                                                                                                                     |
| Are you or any of the contributing authors an employee of the United States government? |                                                                                                                                                                                                                                                                                                                                                                                                                                                                                                                                                                                                                                                                                                                                                                                                                                                                                                                                                                                                                                                                                                                                                                                                                                                                                                                                                                                                                                                                                                                                                                                                                                                                                                                                                                                                                                                                                                                                                                                                                                                                                                                                                                                                                                                                                                           |
| Manuscripts authored by one or more US                                                  |                                                                                                                                                                                                                                                                                                                                                                                                                                                                                                                                                                                                                                                                                                                                                                                                                                                                                                                                                                                                                                                                                                                                                                                                                                                                                                                                                                                                                                                                                                                                                                                                                                                                                                                                                                                                                                                                                                                                                                                                                                                                                                                                                                                                                                                                                                           |

|                                                                                                                                                                                                                                                                                                                                                                                                                                                                                                                                                                                                                                                                                                                                                                                                                                                                                                                                                                                                                                                              |                                                                                       |
|--------------------------------------------------------------------------------------------------------------------------------------------------------------------------------------------------------------------------------------------------------------------------------------------------------------------------------------------------------------------------------------------------------------------------------------------------------------------------------------------------------------------------------------------------------------------------------------------------------------------------------------------------------------------------------------------------------------------------------------------------------------------------------------------------------------------------------------------------------------------------------------------------------------------------------------------------------------------------------------------------------------------------------------------------------------|---------------------------------------------------------------------------------------|
| <p>Government employees are not copyrighted, but are licensed under a <a href="#">CC0 Public Domain Dedication</a>, which allows unlimited distribution and reuse of the article for any lawful purpose. This is a legal requirement for US Government employees.</p> <p>This will be typeset if the manuscript is accepted for publication.</p>                                                                                                                                                                                                                                                                                                                                                                                                                                                                                                                                                                                                                                                                                                             |                                                                                       |
| <p><b>Financial Disclosure</b></p> <p>Enter a financial disclosure statement that describes the sources of funding for the work included in this submission. Review the <a href="#">submission guidelines</a> for detailed requirements. View published research articles from <a href="#">PLOS Neglected Tropical Diseases</a> for specific examples.</p> <p>This statement is required for submission and <b>will appear in the published article</b> if the submission is accepted. Please make sure it is accurate.</p> <p><b>Funded studies</b></p> <p>Enter a statement with the following details:</p> <ul style="list-style-type: none"> <li>• Initials of the authors who received each award</li> <li>• Grant numbers awarded to each author</li> <li>• The full name of each funder</li> <li>• URL of each funder website</li> <li>• Did the sponsors or funders play any role in the study design, data collection and analysis, decision to publish, or preparation of the manuscript?</li> </ul> <p>Did you receive funding for this work?</p> | <p>Yes</p>                                                                            |
| <p>Please add funding details as follow-up to "<b>Financial Disclosure</b></p> <p>Enter a financial disclosure statement that describes the sources of funding for the work included in this submission. Review the <a href="#">submission guidelines</a> for detailed requirements. View published research articles from <a href="#">PLOS Neglected Tropical</a></p>                                                                                                                                                                                                                                                                                                                                                                                                                                                                                                                                                                                                                                                                                       | <p>This study was supported by Kyungpook National University Research Fund, 2022.</p> |

[Diseases](#) for specific examples.

This statement is required for submission and **will appear in the published article** if the submission is accepted. Please make sure it is accurate.

#### Funded studies

Enter a statement with the following details:

- Initials of the authors who received each award
- Grant numbers awarded to each author
- The full name of each funder
- URL of each funder website
- Did the sponsors or funders play any role in the study design, data collection and analysis, decision to publish, or preparation of the manuscript?

Did you receive funding for this work?"

Please select the country of your main research funder (please select carefully as in some cases this is used in fee calculation).

as follow-up to "**Financial Disclosure**

Enter a financial disclosure statement that describes the sources of funding for the work included in this submission. Review the [submission guidelines](#) for detailed requirements. View published research articles from [PLOS Neglected Tropical Diseases](#) for specific examples.

This statement is required for submission and **will appear in the published article** if the submission is accepted. Please make sure it is accurate.

KOREA, REPUBLIC OF - KR

|                                                                                                                                                                                                                                                                                                                                                                                                                                                                                                                                                                                                                |                                                                                                                                                                                                          |
|----------------------------------------------------------------------------------------------------------------------------------------------------------------------------------------------------------------------------------------------------------------------------------------------------------------------------------------------------------------------------------------------------------------------------------------------------------------------------------------------------------------------------------------------------------------------------------------------------------------|----------------------------------------------------------------------------------------------------------------------------------------------------------------------------------------------------------|
| <p><b>Funded studies</b></p> <p>Enter a statement with the following details:</p> <ul style="list-style-type: none"> <li>• Initials of the authors who received each award</li> <li>• Grant numbers awarded to each author</li> <li>• The full name of each funder</li> <li>• URL of each funder website</li> <li>• Did the sponsors or funders play any role in the study design, data collection and analysis, decision to publish, or preparation of the manuscript?</li> </ul> <p>Did you receive funding for this work?"</p>                                                                              |                                                                                                                                                                                                          |
| <p><b>Competing Interests</b></p> <p>On behalf of all authors, disclose any competing interests that could be perceived to bias this work.</p> <p>This statement will be typeset if the manuscript is accepted for publication.</p> <p>Review the instructions link below and PLOS NTDs' <a href="#">competing interests</a> policy to determine what information must be disclosed at submission.</p>                                                                                                                                                                                                         | <p>The authors declare that no competing interests exist.</p>                                                                                                                                            |
| <p><b>Data Availability</b></p> <p>Provide a <b>Data Availability Statement</b> in the box below. This statement should detail where the data used in this submission can be accessed. This statement will be typeset if the manuscript is accepted for publication.</p> <p>Before publication, authors are required to make all data underlying their findings fully available, without restriction. Review our <a href="#">PLOS Data Policy</a> page for detailed information on this policy. Instructions for writing your Data Availability statement can be accessed via the Instructions link below.</p> | <p>All data generated during this study are included in the article. The nucleotide sequences obtained in the present study have been deposited in the GenBank database under the accession numbers.</p> |

1  
2  
3  
4  
5  
6  
7  
8  
9  
10  
11  
12  
13  
14  
15  
16

**Molecular surveillance of zoonotic pathogens from wild rodents in the Republic of Korea**

**Kyoung-Seong Choi<sup>1,\*</sup>, Sunwoo Hwang<sup>1</sup>, Myung Cheol Kim<sup>2</sup>, Hyung-Chul Cho<sup>1</sup>, Yu-Jin Park<sup>1</sup>, Min-Jeong Ji<sup>1</sup>, Sun-Woo Han<sup>3</sup>, Joon-Seok Chae<sup>3</sup>**

<sup>1</sup>Department of Animal Science and Biotechnology, College of Ecology and Environmental Science, Kyungpook National University, Sangju, Republic of Korea

<sup>2</sup>Department of Ecological Science, College of Ecology and Environmental Science, Kyungpook National University, Sangju, Republic of Korea

<sup>3</sup>Laboratory of Veterinary Internal Medicine, BK21 FOUR Future Veterinary Medicine Leading Education and Research Centre, Research Institute for Veterinary Science and College of Veterinary Medicine, Seoul National University, Seoul, Republic of Korea.

\*[kschoi3@knu.ac.kr](mailto:kschoi3@knu.ac.kr) (KSC)

17 **Abstract**

18 **Background**

19 Rodents are recognized as major reservoirs of numerous zoonotic pathogens and are  
20 involved in the transmission and maintenance of infectious diseases. Most importantly, despite  
21 their importance, diseases transmitted by rodents have been neglected. To date, there have been  
22 limited epidemiological studies on rodents and their information is still scarce in the Republic  
23 of Korea (ROK).

24  
25 **Methodology/Principal findings**

26 We investigated rodent-borne pathogens by PCR/RT-PCR from 156 rodents, including  
27 151 *Apodemus agrarius* and 5 *Rattus norvegicus* collected from 27 regions in eight provinces  
28 across the ROK between March 2019 and November 2020. Spleen, kidney, and blood samples  
29 were used for detecting *Anaplasma phagocytophilum*, *Bartonella* spp., *Borrelia burgdorferi*  
30 sensu lato group, *Coxiella burnetii*, *Leptospira interrogans*, and severe fever with  
31 thrombocytopenia syndrome virus (SFTSV). Of the 156 rodents, 73 (46.8%) were infected with  
32 *Bartonella* spp., 25 (16.0%) with *C. burnetii*, 24 (15.4%) with *L. interrogans*, 21 (13.5%) with  
33 *A. phagocytophilum*, 9 (5.8%) with SFTSV, and 5 (3.2%) with *Borrelia afzelli*. Co-infections  
34 with two and three pathogens were detected in 33 (21.1%) and 11 rodents (7.1%), respectively.  
35 *A. phagocytophilum* was detected in all regions, with a widespread occurrence in the ROK. The  
36 infection rates of *Bartonella* spp. were 83.3% for *B. grahamii* and 16.7% for *B. taylorii*.

37  
38 **Conclusions/Significance**

39 To our best knowledge, this is the first report of *C. burnetii* and SFTSV infections in  
40 rodents in the ROK. Our study also provides the first description of various rodent-borne

41 pathogens through an extensive epidemiological survey in the ROK. Our results suggest that  
42 rodents harbor various pathogens, posing a potential threat to public health. Altogether, this  
43 study provides useful information on the occurrence and distribution of zoonotic pathogens  
44 disseminated among rodents and emphasizes the urgent need for rapid diagnosis, prevention,  
45 and control strategies toward these zoonotic diseases.

46

#### 47 **Author summary**

48         Rodents live anywhere in the world and transmit various infectious diseases to humans  
49 and other animals. All the six pathogens examined in this study were detected in rodents. Our  
50 findings demonstrated that 66.7% (104/156) of rodents were infected with at least one pathogen.  
51 We also observed differences in the pathogens detected in rodents by region. Our results  
52 support evidence that rodents play an important role in the transmission of SFTSV. Although  
53 we did not screen all rodent-borne diseases, these data will help understand the emerging  
54 rodent-borne diseases disseminated in the ROK. These results emphasize the risk of occurrence  
55 of rodent-borne diseases.

56

## 57 **Introduction**

58           Rodents are globally abundant and well-known reservoirs and vectors of infectious  
59 diseases affecting both livestock and humans [1, 2]. The current global change context (e.g.,  
60 land-use change, urbanization, and temperature increase) is particularly suitable for the  
61 expansion of several rodent species beyond their natural distribution areas [3, 4]. Rodents are  
62 widespread in rural and urban areas and, in particular, cause numerous human infections in  
63 areas where humans are in close contact with rodents. Rodents are reservoir hosts for at least  
64 60 zoonotic diseases and play a vital role in their transmission, which spread directly through  
65 contact or bite or indirectly through arthropods [5-7]. Despite their potential threat to public  
66 health, there has been less focus on diseases transmitted by rodents [8, 9]. Moreover, the control  
67 of rodents is tremendously difficult, considering their behavioral plasticity, life history traits,  
68 and high breeding potential [3].

69           *Anaplasma phagocytophilum* is a tick-transmitted, obligatory intracellular zoonotic  
70 bacterium and infects neutrophils of various hosts, including humans, dogs, cats, horses,  
71 domestic animals, and wild animals [10-13]. The clinical signs of *A. phagocytophilum* infection  
72 range from asymptomatic to serious symptoms of veterinary and public health importance. The  
73 occurrence of *A. phagocytophilum* is increasing along with climate change worldwide. A broad  
74 variety of animal species are known to harbor *A. phagocytophilum*, and humans are incidental  
75 dead-end hosts [14]. Vertebrate hosts are crucial for the maintenance and circulation of this  
76 pathogen in enzootic foci. Of them, in particular, small rodents and wild ruminants have been  
77 suggested as primary reservoirs [15-19]. In the United States, the white-footed mouse  
78 (*Peromyscus leucopus*) is considered a well-established reservoir species [20, 21]. In the



79 Republic of Korea (ROK), *A. phagocytophilum* has also been detected in small mammals such  
80 as rodents and shrew (*Crocidura lasiura*) [22, 23].

81 *Bartonella* spp. are facultative intracellular bacteria that cause persistent infections in  
82 erythrocytes and endothelial cells of mammalian hosts [24]. The clinical manifestations caused  
83 by these species are characterized by fever, endocarditis, myocarditis, neuroretinitis,  
84 lymphadenopathy, and a range of vascular pathologies [24-28]. Currently, more than 30  
85 *Bartonella* spp. and three subspecies are identified [29], and at least 20 species are associated  
86 with rodents, indicating that rodents serve as potential reservoirs for zoonotic *Bartonella* spp.  
87 [30-32]. Among the rodent adapted *Bartonella* spp., *B. elizabethae*, *B. grahamii*, *B. rochalimae*,  
88 *B. tribocorum*, *B. vinsonii*, and *B. washoensis* have been found to cause human infections [32,  
89 33]. In general, *Bartonella* spp. have been considered to be transmitted by arthropods [24, 31].  
90 Although *Bartonella* infections are widely distributed in rodents of different geographic  
91 regions [34-41], there is extremely little information on the distribution and prevalence of these  
92 species in rodents in the ROK [22, 42, 43].

93 Lyme borreliosis (LB) is one of the most common vector-borne diseases in North  
94 America and Eurasia and caused by a spirochete belonging to the *Borrelia burgdorferi* sensu  
95 lato (s.l.) group [44]. Among this group, *B. burgdorferi* sensu stricto (s.s.), *B. afzelii*, and *B.*  
96 *garinii* are the major causative agents of LB in humans and exhibit different geographical  
97 distributions [45, 46]. These species are transmitted between vertebrate hosts and tick vectors  
98 [47]. *B. burgdorferi* s. s. occurs in North America and Europe and has various reservoir hosts  
99 (e.g., rodents and birds), whereas *B. afzelii* and *B. garinii* occur in Eurasia and can only use  
100 specific vertebrates such as rodents and birds, respectively [44, 45]. Different *Borrelia* species  
101 cause different symptoms in humans. For instance, *B. burgdorferi* s. s. infection is associated  
102 with Lyme arthritis, whereas *B. garinii* is mostly linked to neuroborreliosis, and *B. afzelii*

103 infection is related to a chronic skin condition known as acrodermatitis [44, 48-50]. In the ROK,  
104 *B. burgdorferi* s.l. was first detected in 1993 and sporadically identified in ticks, dogs, horses,  
105 wild rodents, and humans [51-56].

106 *Coxiella burnetii* is an obligate intracellular bacterium with a worldwide distribution  
107 and is the causative agent of Q fever in humans and a wide range of animals [57]. It is highly  
108 infectious and has the ability to form spore-like particles that withstand harsh environmental  
109 conditions and can be easily dispersed by airflow [58]. Humans acquire *C. burnetii* infection  
110 through inhalation of contaminated aerosols or dust particles [59]. Q fever is a public health  
111 concern as it ranks as one of the 13 leading global priority zoonoses. Moreover, it has been  
112 considered a potential biological weapon due to its widespread availability, aerosolized use,  
113 and environmental stability [60]. The clinical manifestation of *C. burnetii* infection is  
114 characterized by fever and flu-like symptoms. The major sources for these infections are  
115 infected ruminants in which the agent may cause abortion and infertility. Ticks and rodents are  
116 also known as natural reservoirs of *C. burnetii* [61]. Recently, studies have been conducted on  
117 the molecular characterization of this pathogen in domestic animals in the ROK [57, 62];  
118 however, these studies have limited distribution on spatially and are species-specific.

119 Leptospirosis is a zoonotic infectious disease with a global distribution and is caused  
120 by a spirochete of the genus *Leptospira* [63, 64]. It infects more than one million people  
121 annually, with 60,000 deaths recorded [65]. *Leptospira* is maintained in several wild and  
122 domestic animal hosts through the renal carriage and is excreted in the urine for several months  
123 [66, 67]. Infection in humans and animals primarily occurs through direct contact with the urine  
124 of infected hosts or indirect exposure to contaminated water, soil, or food [68]. Its clinical  
125 manifestations in humans range from mild febrile illness to life-threatening renal failure,  
126 pulmonary hemorrhage, and/or cardiac complications [69]. Recent studies suggest that an

127 increase in the incidence of leptospirosis in humans is often associated with climate changes  
128 such as heavy rainfall and flooding [70, 71]. Rodents are considered the most important  
129 reservoir of pathogenic *Leptospira* spp. because of their close contact with humans and  
130 domestic animals, contributing to disease transmission [72]. *L. interrogans*, *L. borgpetersenii*,  
131 and *L. kirschneri* are the most abundant species circulating in humans and animals worldwide  
132 [73], with *L. interrogans* being the most described in rodents [72].

133 Severe fever with thrombocytopenia syndrome (SFTS) is an emerging tick-borne viral  
134 disease and has been primarily reported in China, the ROK, Japan, Vietnam, and Taiwan [74-  
135 78]. SFTS is caused by *Huaiyangshan banyangvirus* [formerly the SFTS virus (SFTSV)]  
136 belonging to the genus *Banyangvirus* in the family *Phenuiviridae*. SFTSV infections are  
137 characterized by high fever, fatigue, myalgia, gastrointestinal symptoms, thrombocytopenia,  
138 and multiorgan failures [74, 79]. SFTSV could also spread from person to person through  
139 exposure to infected blood [80]. Due to the life-threatening threat to public health, SFTS was  
140 chosen as one of the nine emerging diseases given a priority for research and development by  
141 the World Health Organization in 2017 [81]. As humans are often in close contact with  
142 domestic animals and may encounter rodents when they work outdoors, transmission between  
143 animals and humans is another possible major transmission route [82]. The overall mortality  
144 rate of this disease has been reported to be 3%–30% in different countries [74, 83, 84].  
145 Although SFTSV was identified in various animals, its natural reservoir hosts have not been  
146 determined.

147 As such, rodents are involved in the transmission cycles of various diseases. Recently,  
148 the incidence of various infectious diseases is rapidly increasing worldwide due to global  
149 warming. Rodent populations are also growing exponentially due to climate change and  
150 urbanization. To date, most studies on rodent-borne diseases in the ROK have been primarily

151 focused on identifying hantavirus infection. Although rodents are considered important  
152 reservoirs of zoonotic infectious pathogens, their epidemiological information has been limited  
153 in the ROK. Therefore, the aims of this study were to investigate the occurrence of rodent-  
154 borne diseases, characterize the genetic relationship, and determine their role as reservoir hosts  
155 for these diseases.

156

## 157 **Methods**

### 158 **Ethical statement**

159 Rodent collection was approved by the Seoul National University Institutional Animal  
160 Care and Use Committee (No. SNU-190524-2-1) and performed according to Seoul National  
161 University Guidelines on the care and use of laboratory animals.

162

### 163 **Sample collection**

164 Rodents were captured using Sherman traps (3 × 3.5 × 9 inches folding traps; H.B.  
165 Sherman Traps, Tallahassee, FL, USA) from 27 regions in eight provinces across the country  
166 between March 2019 and November 2020. These traps were set where human infections with  
167 SFTSV had been reported based on statistical data of the Korea Disease Control and Prevention  
168 Agency. They were installed at regions near rivers, valleys, farms, mountains, and lakes  
169 between 5 p.m. and 6 p.m. and retrieved the next day between 9 a.m. and 10 a.m. The captured  
170 rodents were transported to the laboratory in an icebox with traps, the species was identified,  
171 and they were euthanized using CO<sub>2</sub>. Thereafter, blood, spleen, and kidney samples were  
172 collected from each animal. A whole blood sample was also collected in an SST, and then  
173 serum was separated and used for RNA extraction.

174

### 175 **DNA/RNA extraction and PCR analysis**

176 DNA was extracted from spleen (10 mg) and kidney (25 mg) samples using the  
177 DNeasy Blood & Tissue Kit (Qiagen, Hilden, Germany) according to the manufacturer's  
178 instructions and stored at −20°C until analysis. Splenic DNA was subjected to PCR

179 amplification to detect *A. phagocytophilum*, *Bartonella* spp., *Borrelia* spp., and *C. burnetii*,  
180 whereas kidney DNA was subjected to detect *L. interrogans*. These pathogens were screened  
181 using each specific primer by the nested PCR method under the following conditions: 93°C–  
182 95°C for 5 min, followed by 30-40 cycles of 93°C–95°C for 1 min, the annealing temperature  
183 of each pathogen, 72°C for 1 min, and a final extension step at 72°C for 10 min (Table 1).  
184 Distilled water was used as a negative control in all PCRs. Secondary PCR products were  
185 visualized on 1.5% agarose gels stained with ethidium bromide.

186 RNA was extracted from 200- $\mu$ L aliquots of serum using the Gene-spin Viral  
187 DNA/RNA Extraction Kit (iNtRON Biotechnology, Seongnam, ROK) according to the  
188 manufacturer's instructions. The viral RNA was stored at – 80°C until use. Each RNA sample  
189 was tested using nested reverse transcription-polymerase chain reaction (RT-PCR) assays to  
190 detect the small (S) segment of SFTSV. Primary PCR was performed using one-step RT-PCR  
191 premix (Solgent, Daejeon, ROK) under the following conditions: an initial step of 30 min at  
192 50°C and 15 min at 95°C for denaturation, followed by 40 cycles of 20 s at 95°C, 40 s at 52°C,  
193 and 30 s at 72°C, with a final extension step of 5 min at 72°C. Nested PCR was conducted  
194 using 1  $\mu$ L of the primary PCR product as a template (BIOFACT, Daejeon, ROK). The reaction  
195 for the nested PCR consisted of 25 cycles of 20 s at 94°C, 40 s at 55 °C, and 30 s at 72°C. The  
196 primer information used to detect SFTSV was listed in Table 1. Secondary PCR products were  
197 visualized on 1.5% agarose gels stained with ethidium bromide.

198

## 199 **Phylogenetic analysis**

200 The secondary PCR products were purified using an AccuPrep<sup>®</sup> PCR Purification Kit  
201 (Bioneer, Daejeon, ROK) according to the manufacturer's instructions and directly sequenced  
202 (Macrogen Inc., Seoul, Korea). All the obtained nucleotide sequences for each pathogen were

203 aligned using the BioEdit software and then compared with reference sequences from the  
204 National Center for Biotechnology Information database (<http://www.ncbi.nlm.nih.gov>) to  
205 determine similarity. Phylogenetic analysis of each pathogen was performed using the  
206 maximum-likelihood method implemented in MEGA11 using the best substitution model.  
207 Bootstrap values were calculated by analyzing 1000 replicates to evaluate the reliability of  
208 clusters. The models used in this study were K2 + G for *A. phagocytophilum*, Tamura 3-  
209 parameter + G + I for *Bartonella* spp., Tamura-Nei for *Borrelia* spp., and Kimura 2-parameter  
210 model for *C. burnetii*, *L. interrogans*, and SFTSV. The nucleotide sequences obtained in this  
211 study were assigned the following accession numbers: OR287077–OR287091 for *A.*  
212 *phagocytophilum*, OR288176–OR288190 for *B. grahamii*, OR288191–OR288193 for *B.*  
213 *taylorii*, OR284310–OR284311 for *B. afzelii*, OR284312–OR284321 for *C. burnetii*,  
214 OR284322–OR284324 for *L. interrogans*, and OR257718 – OR257726 for SFTSV.

215

## 216 **Results**

### 217 **Collection of samples**

218 A total of 175 rodents were captured and morphologically classified as follows:  
219 *Apodemus agrarius* (striped field mouse) ( $n = 151$ ), *Rattus norvegicus* (Norway rat) ( $n = 5$ ),  
220 and unknown ( $n = 19$ ). Information of the captured rodents was presented in Table 2. Unknown  
221 samples were excluded from this study, and the remaining 156 rodents were used for data  
222 analysis. *A. agrarius* was mostly found in the ROK, whereas *R. norvegicus* was captured in  
223 only two regions.

### 225 **Prevalence of pathogens detected from captured rodents**

226 The presence of six pathogens was investigated by PCR analysis from the two species,  
227 *A. agrarius* and *R. norvegicus*. Of the 156 rodents, 104 (66.7%) were infected with at least one  
228 pathogen. None of the tested pathogens were detected in 52 rodents (33.3%). In terms of  
229 pathogen, *Bartonella* spp. were the mostly detected (73/156, 46.8%), followed by *C. burnetii*  
230 (25/156, 16.0%), *L. interrogans* (24/156, 15.4%), *A. phagocytophilum* (21/156, 13.5%),  
231 SFTSV (9/156, 5.8%), and then *Borrelia* spp. (5/156, 3.2%) (Table 3). The details of the  
232 pathogens determined according to the regions are shown in Table 3. All six pathogens were  
233 detected in Gangwon, Chungbuk, and Gyeongbuk provinces. Five pathogens, except for  
234 SFTSV, were found in Gyeongnam province, whereas only one pathogen was detected in  
235 Chungnam and Jeonnam provinces (Table 3). Co-infections with two and three pathogens from  
236 the captured rodents were also detected in 33 and 11 animals, respectively (Table 4), with co-  
237 infection with *Bartonella* spp. and *L. interrogans* being most frequently detected (Table 4).  
238 SFTSV was co-infected with *Bartonella* spp. The information of pathogens identified



239 according to the region is marked in a map (Fig 1). To the best of our knowledge, this is the  
240 first study to report *C. burnetii* and SFTSV infections in rodents in the ROK.

241

## 242 **Phylogenetic trees of rodent-associated pathogens**

### 243 ***Anaplasma phagocytophilum***

244 *A. phagocytophilum* was detected only in *A. agrarius* and found in all the examined  
245 regions, indicating that this pathogen was spread in the ROK. Of the 21 positive samples, 15  
246 were successfully sequenced and confirmed as *A. phagocytophilum* by the phylogenetic tree  
247 analysis based on the 16S rRNA gene (Fig 2). Our sequences exhibited 97.6%–99.9% identity  
248 to each other and 95.6%–100% identity with those reported from the ROK. The 15 sequences  
249 obtained from *A. agrarius* were similar to those previously reported from several different hosts  
250 such as cat, cattle, dog, horse, human, tick, and rodents in other countries, sharing 95.9%–100%  
251 nucleotide identities with these. Furthermore, several variants co-existed in the same  
252 geographical area. According to the phylogenetic tree, *A. phagocytophilum* was divided into  
253 clade 1 and clade 2, and all our sequences from *A. agrarius* belonged to clade 1 (Fig 2). The  
254 difference in sequences between clade 1 and clade 2 revealed 94.7%–98.5% identities. Clade  
255 2 had 10 nucleotide differences compared with those of clade 1. Genetic variants were detected  
256 in *A. phagocytophilum* circulating in the ROK.

257

### 258 ***Bartonella* spp.**

259 *Bartonella* spp. were the most detected in *A. agrarius* in the ROK, but they were not  
260 found in all regions. *Bartonella* spp. were detected in both *A. agrarius* and *R. norvegicus*. Of  
261 the 73 ITS PCR-positive samples, 18 sequences were successfully obtained, and all these

262 originated from *A. agrarius*, not *R. norvegicus* (Table 3). According to the phylogenetic tree  
263 based on internal transcribed spacer (*ITS*), *Bartonella* spp. circulating in the examined rodents  
264 were identified as two species, viz., *B. grahamii*, and *B. taylorii* (Fig 3). The prevalence of *B.*  
265 *grahamii* was 83.3% (15/18), and that of *B. taylorii* was 16.7% (3/18). The 15 sequences  
266 belonging to *B. grahamii* showed 92.9%–100% identity to each other and formed the same  
267 group with leeches (KX270012) and another *A. agrarius* (JN810851) reported in the ROK,  
268 exhibiting 95.9%–99.8% identity with those. Furthermore, another sequence (JN810855)  
269 reported from *A. agrarius* in the ROK demonstrated 87.1%–90.8% similarity to sequences  
270 reported in our study. The three sequences classified into *B. taylorii* exhibited 100% identity to  
271 each other and shared 92.5%–100% identity with those belonging to this species.

272

### 273 ***Borrelia* spp.**

274 *Borrelia* spp. were detected in five *A. agrarius* and the infection rate of *Borrelia* spp.  
275 was the lowest (3.2%) compared with that of other pathogens identified. *Borrelia* spp. were  
276 found in four regions (Table 3). Among the five PCR-positive samples, only two sequences  
277 were obtained and that demonstrated 98.6% identity to each other. The phylogenetic analysis  
278 based on outer surface protein A (*ospA*) gene revealed that our sequences were assigned to *B.*  
279 *afzelii* (Fig 4). The two sequences exhibited 98.9%–100% homology with *A. agrarius* reported  
280 previously in the ROK. Our sequences showed 97.8%–100% identity to those belonging to this  
281 group. Furthermore, these sequences displayed 98.2%–99.6% similarity to those reported in  
282 humans from Austria, Germany, the Czech Republic, Korea, and Sweden.

283

### 284 ***Coxiella burnetii***

285 *C. burnetii* was the second most frequently detected pathogen and identified in both *A.*  
286 *agrarius* and *R. norvegicus*. However, it was found in five different regions. Of the 25 positive  
287 samples, 10 sequences were obtained and included in the phylogenetic tree based on *IS1111*  
288 gene. These sequences showed 97.5%–100% identity to each other. Only one sequence  
289 (OR284314) had the closest genetic relationship with those of febrile and pneumonic patients  
290 (KP645188 and JF970260), which were known as virulent strains, exhibiting 100% homology  
291 with those (Fig 5). The others formed a separate branch, exhibiting 99.0%–99.5% identity to  
292 these two human isolates (KP645188 and JF970260). The phylogenetic tree revealed the  
293 presence of several genetic clades within *C. burnetii* sequences. These findings indicated the  
294 presence of genetic variations in the *C. burnetii* sequences identified in *A. agrarius*.

295

### 296 ***Leptospira interrogans***

297 *L. interrogans* was the third most detected pathogen and also found in both *A. agrarius*  
298 and *R. norvegicus*. Of the 24 positive samples, only three sequences were obtained and had  
299 97.7%–99.5% identity to each other. The phylogenetic tree based on the RNA polymerase  
300 subunit beta (*rpoB*) gene revealed that these sequences belonged to *L. interrogans* (Fig 6). Two  
301 sequences (OR284322 and OR284323) were classified into *L. interrogans* serovar *Lai* and  
302 showed 99.2%–100% identity with those reported in China and 99.4%–100% identity with *A.*  
303 *agrarius* reported in Korea. The other sequence (OR284324) belonged to *L. interrogans*  
304 serovar *Manilae* detected in *Mus musculus* in Japan, exhibiting 98.2% similarity to them (Fig  
305 6). At least two serovars of *L. interrogans* were found to be circulating in *A. agrarius* in the  
306 ROK.

307

### 308 **Severe fever with thrombocytopenia syndrome virus**

309 SFTSV was detected in nine *A. agrarius* (5.7%) and found in four different regions  
310 (Table 3). Of the nine SFTSV infections, single infection of SFTSV was detected only in two  
311 *A. agrarius* and the remaining were primarily co-infected with other pathogens such as  
312 *Bartonella* spp. and *L. interrogans* (Table 4). Nine sequences were obtained and included in  
313 the phylogenetic tree. These sequences demonstrated 95.95%–100.0% identity to each other.  
314 The phylogenetic analysis based on the S segments revealed that five and four sequences were  
315 classified into subgenotype B-2 and genotype D, respectively (Fig. 7). The sequences  
316 belonging to genotype B-2 exhibited 94.51%–97.4% homology with human and other animal  
317 samples reported in the ROK, whereas the four sequences showed 99.71%–100.0% identity  
318 with human samples. These results revealed that genotype B-2 is prevalent in the ROK, and  
319 genetic variants exist within genotype B-2.

320

## 321 **Discussion**

322 This study demonstrated the prevalence and genetic characterization of potentially  
323 zoonotic pathogens by molecular analysis in rodents captured from throughout the ROK. *A.*  
324 *agrarius* was the most common species in the ROK. Rodents were trapped from areas with  
325 frequent movement of people, which may be associated with a high probability of disease  
326 transmission because humans and rodents share the same space. All the six pathogens  
327 examined in this study were detected in rodents. The results demonstrated that 66.7% (104/156)  
328 of rodents were infected with at least one pathogen. According to our findings, *Bartonella* spp.  
329 were most frequently detected, and *Borrelia* spp. were least detected in rodents. Although the  
330 infection rate was not very high, *A. phagocytophilum* was found in all regions. Considering  
331 that the number of rodents captured was different by the region and was small in some  
332 provinces, *A. phagocytophilum* may be the most widespread in the ROK. Furthermore, to the  
333 best of our knowledge, this is the first study to report *C. burnetii* and SFTSV infections in  
334 rodents in the ROK and an extensive study to investigate the infections of various pathogens.  
335 ~~Our results demonstrate that rodents play a vital role in the natural infection cycle of *Anaplasma*,~~  
336 ~~*Bartonella*, *Borrelia*, *Coxiella*, *Leptospira*, and SFTSV in the ROK. Therefore, our findings~~  
337 ~~suggest that rodents can directly or indirectly transmit several diseases to humans. Moreover,~~  
338 these data provide valuable information for evaluating the potential risk of rodents in public  
339 health.

340 *Anaplasma phagocytophilum* has been known as the third most common tick-borne  
341 pathogen in the USA and Europe [85] and was detected in 20 different rodent species [86]. *A.*  
342 *phagocytophilum* infection varies considerably in rodent species [86], which may be explained  
343 by differences in small mammals that maintain the tick species. In this study, the prevalence of

344 *A. phagocytophilum* from *A. agrarius* was 13.5%, which was rather low compared with that  
345 reported in a previous study conducted in the ROK (19.1%) [87]. To date, there has been no  
346 report of *A. phagocytophilum* infection from *Rattus* spp. in the ROK, although a high infection  
347 rate (31.5%) of *A. phagocytophilum* was reported in *Rattus* spp. from China [88]. ~~This suggests~~  
348 ~~that *Rattus norvegicus* is not involved as a reservoir in the transmission cycle of this bacterium~~  
349 ~~in the ROK. *A. phagocytophilum* has been detected in a variety of animals, including ticks in~~  
350 ~~the ROK, but its pathogenicity still remains unclear. When our sequences were compared with~~  
351 ~~those of *A. phagocytophilum* human agent, we observed differences in four of the six~~  
352 ~~nucleotides [89]. According to the phylogenetic analysis, *A. phagocytophilum* circulating in~~  
353 ~~the ROK had several genetic variants. As of now, we cannot conclude whether these variants~~  
354 ~~are pathogenic or non-pathogenic because *A. phagocytophilum* was detected using the 16S~~  
355 ~~rRNA gene. Nevertheless, these variants can infect other hosts as well as humans irrespective~~  
356 ~~of their pathogenicity, and they have been considered zoonotic. *Haemaphysalis longicornis*~~  
357 ~~found primarily in the ROK may tend to use *A. agrarius* as the major host to maintain *A.*~~  
358 ~~*phagocytophilum*, indicating that *A. agrarius* is an enzootic reservoir. Hence, further studies~~  
359 ~~are required to determine its pathogenicity of *A. phagocytophilum* variants circulating in the~~  
360 ~~ROK.~~

361         The overall prevalence of *Bartonella* spp. in *A. agrarius* was 46.8% and the highest  
362 compared with that of all other pathogens examined in this study. However, compared with a  
363 previous report (62.0%) based on *ITS*, the detection rate in the present study was rather low  
364 [43]; this difference may be because of the location where the rodents were captured. Moreover,  
365 its prevalence in rodents varied across countries, e.g., 5.5% in Turkey [37], 23.7% in Lithuania  
366 [90], 36.3% in Chile [32], 40.4% in Slovenia [34], and 65.8% in Eastern Germany [41]. ~~The~~  
367 ~~difference in prevalence by country may be due to rodent species. Nonetheless, *Bartonella* spp.~~

368 ~~infections are highly prevalent in rodents. Moreover, *Bartonella* spp. that are prevalent in each~~  
369 ~~country are different [27, 32, 34, 38, 90-93]. Although *Bartonella* was detected in both *A.*~~  
370 ~~*agrarius* and *R. norvegicus*, it was not possible to confirm which species was detected in *R.*~~  
371 ~~*norvegicus* because the amplified samples from only *A. agrarius* were sequenced. *R.*~~  
372 ~~*norvegicus* and *R. rattus* have been known as major reservoirs for *Bartonella* spp. in several~~  
373 ~~countries [27, 94-96], but there has been no report of *Bartonella* detection from other rodent~~  
374 ~~species as well as *R. norvegicus* in the ROK [22]. Further studies are necessary to investigate~~  
375 ~~*Bartonella* spp. infection in *R. norvegicus*. The present results demonstrated that *B. grahamii*~~  
376 ~~was most predominant and *B. taylorii* was found in three rodents, a finding consistent with a~~  
377 ~~previous study [43]. *B. grahamii* is a zoonotic pathogen and associated with neuroretinitis and~~  
378 ~~retinal artery occlusion in humans [25]. *B. taylorii* can cause infection in animals [90], but its~~  
379 ~~pathogenicity remains yet unclear. In Europe, *B. taylorii* is dominant in rodents [24, 37].~~  
380 ~~Although *B. taylorii* has been detected in some *A. agrarius* in the ROK, its transmission route~~  
381 ~~remains unknown. *B. grahamii* identified in this study showed 87.1%–99.8% similarity to~~  
382 ~~those detected previously in the ROK, indicating that genetic diversity exists. At this point, we~~  
383 ~~cannot determine whether the difference is due to host adaptation. Several studies have reported~~  
384 ~~that although the ITS region has high sensitivity in detection, it provides a higher sequential~~  
385 ~~diversity than to other genes [34, 43], which supports our results. Considering the high infection~~  
386 ~~rate in *A. agrarius* and its close contact with humans and other animals, the importance of~~  
387 ~~*Bartonella* as a potential public health concern should not be ignored.~~

388         The detection rate of *Borrelia* spp. from *A. agrarius* was 3.2% and also the lowest  
389 compared with that of other pathogens examined in this study. Our result was different from  
390 that of previous studies conducted on heart from *A. agrarius* (29.6%) [56] and in ticks (33.6%)  
391 collected from wild rodents [97] in the ROK. This can be explained by the difference in the

392 sample used. For instance, Kim et al. reported that *B. burgdorferi* s.s. and *B. garinii* infected  
393 the spleen and *B. afzelii* exhibited a high detection rate in the heart [56]; however, *B.*  
394 *burgdorferi* s.s. and *B. garinii* were not detected in the spleen. ~~It is speculated that the number~~  
395 ~~of positive samples was small and could not be detected.~~ Among the *Borrelia burgdorferi* s.l.  
396 group, only *B. afzelii* was identified in *A. agrarius*, which supports previous findings that *B.*  
397 *afzelii* is the predominant species in the ROK [54, 97]. Furthermore, our results were  
398 significantly lower than those reported in rodents from other countries, e.g., 24% in Austria  
399 [98], 16% in the Czech Republic [99], and 6.3% in Spain [100]. These differences in prevalence  
400 may be due to the tick vectors; the common tick vectors of *Borrelia* spp. in the ROK are *Ixodes*  
401 *persulcatus*, *I. nipponensis*, and *I. granulatus* [101]. *B. afzelii* is transmitted by *Ixodes ricinus*  
402 and hosted by small mammals, and it is the most common causative agent of human LB [45,  
403 102]. ~~*B. afzelii* is known to cause acrodermatitis; it readily disseminates from the skin (ear) to~~  
404 ~~joint and heart tissue in its primary natural hosts. The bacterial loads in each tissue differed~~  
405 ~~between host species [44], which may depend on the host species it infects. Collectively, *B.*~~  
406 ~~*afzelii* possesses the ability to replicate in and attach to a variety of tissues. In the ROK, *B.*~~  
407 ~~*afzelii* has been primarily reported in ticks [54, 97, 103] and rarely in humans [104]. However,~~  
408 ~~there is still a lack of information on *B. afzelii*. Considering that the infection rate of *B. afzelii*~~  
409 ~~in the ROK is 62.5% in ticks [97] and 25.9% in rodents [56], the possibility that it also occurred~~  
410 ~~in humans cannot be ruled out. In particular, there is very low awareness of the importance of~~  
411 ~~most vector-borne diseases (VBDs) in the ROK, which may have resulted in an underdiagnosis~~  
412 ~~of LB due to similar clinical manifestations of VBDs. Because a high prevalence of *B. afzelii*~~  
413 ~~infection was detected in ticks and rodents, and most importantly, the possibility of LB~~  
414 ~~transmission to humans due to climate change will increase, there exists a need for a systematic~~  
415 ~~strategy for diagnosis, distribution, and control.~~



416 This is the first report of *C. burnetii* in *A. agrarius* in the ROK. In this study, *C. burnetii*  
417 exhibited the second highest infection rate (16%), ~~which was higher than that we anticipated.~~  
418 Nevertheless, our results were lower than those reported in China (18%) [105], Senegal (22.4%)  
419 [106], and Zambia (45%) [107], but higher than those reported in Brazil (4.6%) [93], Egypt  
420 (6.7%) [58], and Italy (1.4%) [61]. These differences may be explained by the rodent species  
421 and samples used for detection. ~~Rodent species, which are predominant, differ in each country.~~  
422 In those studies, *C. burnetii* detection was performed using various samples such as blood,  
423 spleen, livers, and feces. Consequently, liver and spleen are considered suitable for the  
424 identification of *C. burnetii*. According to a previous study, the infection rate of *C. burnetii* in  
425 domestic livestock ranged from 6% to 22.7%, depending on the species [57]. ~~Despite its~~  
426 ~~significance, *C. burnetii* is an underestimated pathogen in the ROK, and there has been no~~  
427 ~~sufficient research on this pathogen.~~ Although *C. burnetii* is a tick-borne pathogen, there are  
428 only a few reports of *C. burnetii* in ticks in the ROK [108, 109]. Recent studies have reported  
429 about the co-infection of *C. burnetii* and SFTSV in ticks and humans [110, 111]; however, there  
430 was no co-infection with two pathogens in rodents. ~~Once *C. burnetii* is detected in rodents, the~~  
431 ~~possibility that *C. burnetii* infection in livestock is transmitted by rodents cannot be ruled out~~  
432 ~~because rodents can frequently enter the barn and infected rodents can contribute to the spread~~  
433 ~~and transmission of this pathogen. Despite the small number of *R. norvegicus* captured, *C.*~~  
434 ~~*burnetii* infection was mostly detected in *R. norvegicus*, which can be because *R. norvegicus*~~  
435 ~~may also serve as a reservoir in the ROK.~~ A phylogenetic analysis based on *IS1111* gene  
436 revealed the presence of two different genotypes within the sequences identified in *A. agrarius*.  
437 One sequence formed the same clade with virulent strains reported in Brazil, whereas the others  
438 exhibited high similarity to strains reported in different countries. ~~Furthermore, the possibility~~  
439 ~~that the remaining sequences are pathogenic cannot be ignored.~~ The disadvantage of *IS1111*

440 gene is that it does not provide exact information, such as pathogenicity and species specificity  
441 (Fig 5); hence, currently, we cannot draw any conclusions on what separate groupings within  
442 *C. burnetii* sequences might represent. Further research is necessary to determine the  
443 pathogenicity of *C. burnetii* circulating in the ROK. The results obtained in the present study  
444 suggest that *A. agrarius* plays an ~~important~~ role in the transmission of *C. burnetii* in humans  
445 and animals.

446 *Leptospira interrogans* is a ~~representative~~ rodent-borne pathogen and accordingly, it  
447 was the third most frequently detected (15.4%) in this study. Our results demonstrated a  
448 relatively high prevalence compared with that of previous studies [87, 112]; ~~this difference is~~  
449 ~~due to the regions examined.~~ This is the first time that *Leptospira* has been investigated in  
450 rodents through sampling of extensive regions in the ROK. Compared with those reported in  
451 other countries, the infection rates ranged from 1.3% to 35.2%, which differed in countries  
452 [113-117]. *R. norvegicus* is also an important reservoir of this pathogen [72]; however, *L.*  
453 *interrogans* was detected in only one *R. norvegicus* and mostly detected in *A. agrarius*, which  
454 can be due to the limited sample number. ~~Considering that *R. norvegicus* is easily found around~~  
455 ~~barns and farmhouses, it also plays a critical role in the transmission of leptospirosis in~~  
456 ~~domestic animals and humans.~~ To date, *L. interrogans* has been divided into 23 serogroups  
457 based on serological methods, with subdivision into more than 300 serovars [72]. The serovars  
458 circulating in each country are different, but the most frequently reported serovar worldwide is  
459 *Icterohaemorrhagiae* [72]. In the ROK, only a few studies have been conducted on serovar *lai*  
460 [87, 118]. Of the three sequences from rodents, two were classified as serovar *lai* and one as  
461 serovar *manila*, consistent with a previous study [87]. Consequently, *lai* and *manilae* are  
462 considered epidemic serovars in the ROK. However, the biggest limitation of the present study  
463 is that a serological analysis such as microscopic agglutination test was not performed, and the

464 PCR target gene used was also different from that used in other studies. Nonetheless, our results  
465 suggest that *rpoB* gene used in this study can be applicable for detection and serovar  
466 identification of *L. interrogans*. Furthermore, for an accurate identification of *L. interrogans*  
467 serovars, a serological test along with PCR method is absolutely necessary. ~~Leptospirosis has~~  
468 ~~a higher prevalence in tropical or warm-climate countries [72]. Due to global warming, Korea~~  
469 ~~has recently shifted to a subtropical warm and wet climate, and the most representative~~  
470 ~~characteristic is the frequent localized heavy rain, such as flooding. Although there is a lack of~~  
471 ~~sufficient research on leptospirosis in the ROK, the higher incidence observed in the present~~  
472 ~~study than that reported previously may be related to climate change. This provides the~~  
473 ~~opportunity of contamination of rivers or soil and, consequently, the potential risk of~~  
474 ~~leptospirosis. These data highlight the need for prevention and control of leptospirosis.~~

475         Since its first identification in China, SFTSV has been primarily detected in Asia [74-  
476 78]. Due to its high mortality rate, there is significant interest in SFTSV [74, 83, 84]. In the  
477 present study, the infection rate of SFTSV in *A. agrarius* was 5.7%, and this is the first report  
478 to describe SFTSV infection from *A. agrarius* in the ROK. Our results were significantly lower  
479 than those reported in China (32.3%) [119]. When the infection rates are compared with those  
480 in other animals reported in the ROK, the prevalence in rodents was similar to that in wild  
481 boars (5.2%) [120] and ticks (6.0%) [121], but higher than that in cats (4.0%) [122], dogs (2.9%)  
482 [123], pigs (1.7%) [124], black goats (2.4%) [125], and wild animals (3.3%) [126]. However,  
483 the prevalence of SFTSV was highest in feral cats (17.5%) in the ROK [127]. Recently, there  
484 is an increase in the populations of feral cats, and they are sharing habitats with wildlife,  
485 domestic animals, and humans. Several studies have demonstrated that SFTSV is transmitted  
486 to humans through direct contact with cats [128, 129], suggesting that feral cats are infected  
487 from rodents. It is believed that SFTSV circulates in a zoonotic cycle between ticks and

488 vertebrates [130]. Rodents are considered the representative reservoirs in maintaining tick-  
489 borne pathogens and may play a vital role in the transmission of SFTSV. ~~Interestingly, in this~~  
490 ~~study, *A. agrarius* was primarily co-infected with *Bartonella* spp. rather than infected with~~  
491 ~~SFTSV alone. As of now, we cannot provide any explanation for the pathogenesis of co-~~  
492 ~~infections. SFTSV can also be transmitted through mouth mucosa or conjunctiva to cause~~  
493 ~~infection [128].~~ The sequences obtained from *A. agrarius* belonged to subgenotype B-2 and D  
494 genotype; the results revealed a similar distribution in both genotypes. Sequences belonging to  
495 subgenotype B-2 were the most prevalent and associated with the highest mortality rate (43.8%)  
496 in the ROK [131], whereas genotype D was primarily found in China. Four sequences  
497 belonging to genotype D were identical to those of a human patient reported in the ROK,  
498 suggesting that this genotype is pathogenic. Different genotypes of SFTSV are known to trigger  
499 different clinical manifestations in a ferret model [130]; however, although clinical  
500 manifestations have not been confirmed in rodents, they may be pathogenic to humans. To date,  
501 SFTSV has been detected in various animals, but no conclusions could be drawn on how the  
502 virus is transmitted to these animals. The results of the present study provide a clue for  
503 understanding the transmission route of SFTSV, thereby suggesting the need to establish a  
504 continuous monitoring and surveillance system to minimize a serious risk of SFTSV infection.

505

## 506 **Conclusions**

507         Urbanization and climate change affect not only on humans but also wildlife. The  
508 biggest concern caused by these changes is that the probability of disease transmission through  
509 ecosystem destruction has been significantly increasing compared with that in the past. This  
510 study investigated the prevalence of zoonotic pathogens in rodent populations through a

511 systematic epidemiological investigation. Although we did not screen all rodent-borne  
512 pathogens, the results indicated that, at least, rodents act as critical reservoirs for *A.*  
513 *phagocytophilum*, *Bartonella* spp., *B. afzelli*, *C. burnetii*, *L. interrogans*, and SFTSV in the  
514 ROK. Our findings also demonstrated that rodents harbor several pathogens, implying the  
515 possibility of simultaneous transmission to humans. Most importantly, except for SFTSV, the  
516 pathogens investigated in this study are misdiagnosed or underdiagnosed in the ROK, so their  
517 importance is being neglected. Therefore, our findings indicate that rodents pose a potential  
518 risk to public health. Overall, our study provides useful information on rodent-borne pathogens  
519 and underscore the urgent need for rapid diagnosis, prevention, and control strategies toward  
520 zoonotic diseases.

521

## 522 **Acknowledgments**

523 We are very grateful to Dong-Hun Jang, Eun-Mi Kim, and Seung-Uk Shin for their  
524 valuable help in sample collection. All authors read and approved the final version.

525

## 526 **Author Contributions**

527 KSC and JSC designed the experiments, SH and MCK performed the experiments and  
528 sample collection. HCC, YJP, MJJ, and SWH carried out data analysis. KSC wrote the  
529 manuscript, which was reviewed by HCC, YJP, MJJ, and JSC.

530

## 531 **Data Availability Statement**

532 All data generated during this study are included in the article. The nucleotide  
533 sequences obtained in the present study have been deposited in the GenBank database under  
534 the accession numbers.

535

536 **Funding**

537           This study was supported by Kyungpook National University Research Fund, 2022.

538

539 **Competing interests**

540           The authors declare that no competing interests exist.

541

542 **References**

- 543 1. Ecke F, Han BA, Hornfeldt B, Khalil H, Magnusson M, Singh NJ, et al. Population  
544 fluctuations and synanthropy explain transmission risk in rodent-borne zoonoses. Nat  
545 Commun. 2022;13(1):7532. <https://doi.org/10.1038/s41467-022-35273-7>. PMID:  
546 36477188.
- 547 2. Sumangali K, Rajapakse R, Rajakaruna R. Urban rodents as potential reservoirs of  
548 zoonoses: a parasitic survey in two selected areas in Kandy district. Ceylon J Sci. (Bio  
549 Sci.) 2012;41(1):71-77. <https://doi.org/10.4038/cjsbs.v41i1.4539>.
- 550 3. Capizzi D, Bertolino S, Mortelliti A. Rating the rat: global patterns and research priorities  
551 in impacts and management of rodent pests. Mamm Rev. 2014;44(2):148-162.  
552 <https://doi.org/10.1111/mam.12019>.
- 553 4. Dalecky A, Bâ K, Piry S, Lippens C, Diagne CA, Kane M, et al. Range expansion of the  
554 invasive house mouse *Mus musculus domesticus* in Senegal, West Africa: a synthesis of  
555 trapping data over three decades, 1983–2014. Mamm Rev. 2015;45(3):176-190.  
556 <https://doi.org/10.1111/mam.12043>.
- 557 5. Banda A, Gandiwa E, Muposhi VK, Muboko N. Ecological interactions, local people  
558 awareness and practices on rodent-borne diseases in Africa: a review. Acta Trop.  
559 2023;238:106743. <https://doi.org/10.1016/j.actatropica.2022.106743>. PMID: 36343664
- 560 6. Lu M, Tang G, Ren Z, Zhang J, Wang W, Qin X, et al. *Ehrlichia*, *Coxiella* and *Bartonella*  
561 infections in rodents from Guizhou Province, Southwest China. Ticks Tick Borne Dis.  
562 2022;13(5):101974. <https://doi.org/10.1016/j.ttbdis.2022.101974>. PMID: 35662068.
- 563 7. Meerburg BG, Singleton GR, Kijlstra A. Rodent-borne diseases and their risks for public  
564 health. Crit Rev Microbiol. 2009;35(3):221-270.  
565 <https://doi.org/10.1080/10408410902989837>. PMID: 19548807.

- 566 8. Morand S, Jittapalapong S, Kosoy M. Rodents as hosts of infectious diseases: biological  
567 and ecological characteristics. *Vector Borne Zoonotic Dis.* 2015;15(1):1-2. [https://doi.org/](https://doi.org/10.1089/vbz.2015.15.1.intro)  
568 10.1089/vbz.2015.15.1.intro. PMID: 25629774.
- 569 9. Selmi R, Belkahia H, Dhibi M, Abdelaali H, Lahmar S, Ben Said M, et al. Zoonotic vector-  
570 borne bacteria in wild rodents and associated ectoparasites from Tunisia. *Infect Genet Evol.*  
571 2021;95:105039. <https://doi.org/10.1016/j.meegid.2021.105039>. PMID: 34438095.
- 572 10. Chen SM, Dumler JS, Bakken JS, Walker DH. Identification of a granulocytotropic  
573 Ehrlichia species as the etiologic agent of human disease. *J Clin Microbiol.*  
574 1994;32(3):589-595. <https://doi.org/10.1128/jcm.32.3.589-595.1994>. PMID: 8195363.
- 575 11. Dumler JS, Barbet AF, Bekker CP, Dasch GA, Palmer GH, Ray SC, et al. Reorganization  
576 of genera in the families *Rickettsiaceae* and *Anaplasmataceae* in the order *Rickettsiales*:  
577 unification of some species of *Ehrlichia* with *Anaplasma*, *Cowdria* with *Ehrlichia* and  
578 *Ehrlichia* with *Neorickettsia*, descriptions of six new species combinations and  
579 designation of *Ehrlichia equi* and 'HGE agent' as subjective synonyms of *Ehrlichia*  
580 *phagocytophila*. *Int J Syst Evol Microbiol.* 2001;51(Pt 6):2145-2165.  
581 <https://doi.org/10.1099/00207713-51-6-2145>. PMID: 11760958.
- 582 12. Lappin MR, Breitschwerdt EB, Jensen WA, Dunnigan B, Rha JY, Williams CR, et al.  
583 Molecular and serologic evidence of *Anaplasma phagocytophilum* infection in cats in  
584 North America. *J Am Vet Med Assoc.* 2004;225(6):893-896.  
585 <https://doi.org/10.2460/javma.2004.225.893>. PMID: 15485049.
- 586 13. Saleem S, Ijaz M, Farooqi SH, Ghaffar A, Ali A, Iqbal K, et al. Equine granulocytic  
587 anaplasmosis 28 years later. *Microb Pathog.* 2018;119:1-8.  
588 <https://doi.org/10.1016/j.micpath.2018.04.001>. PMID: 29626656.
- 589 14. Dumler JS, Choi KS, Garcia-Garcia JC, Barat NS, Scorpio DG, Garyu JW, et al. Human



590 granulocytic anaplasmosis and *Anaplasma phagocytophilum*. Emerg Infect Dis.  
591 2005;11(12):1828-1834. <https://doi.org/10.3201/eid1112.050898>. PMID: 16485466.

592 15. Nicholson WL, Muir S, Sumner JW, Childs JE. Serologic evidence of infection with  
593 *Ehrlichia* spp. in wild rodents (Muridae: Sigmodontinae) in the United States. J Clin  
594 Microbiol. 1998;36(3):695-700. <https://doi.org/10.1128/JCM.36.3.695-700.1998>. PMID:  
595 9508298.

596 16. Alberdi MP, Walker AR, Urquhart KA. Field evidence that roe deer (*Capreolus capreolus*)  
597 are a natural host for *Ehrlichia phagocytophila*. Epidemiol Infect. 2000;124(2):315-323.  
598 <https://doi.org/10.1017/s0950268899003684>. PMID: 10813158.

599 17. Bown KJ, Lambin X, Telford GR, Ogden NH, Telfer S, Woldehiwet Z, et al. Relative  
600 importance of *Ixodes ricinus* and *Ixodes trianguliceps* as vectors for *Anaplasma*  
601 *phagocytophilum* and *Babesia microti* in field vole (*Microtus agrestis*) populations. Appl  
602 Environ Microbiol. 2008;74(23):7118-7125. <https://doi.org/10.1128/AEM.00625-08>.  
603 PMID: 18820068.

604 18. Petrovec M, Sixl W, Schweiger R, Mikulasek S, Elke L, Wust G, et al. Infections of wild  
605 animals with *Anaplasma phagocytophila* in Austria and the Czech Republic. Ann N Y  
606 Acad Sci. 2003;990:103-106. <https://doi.org/10.1111/j.1749-6632.2003.tb07345.x>. PMID:  
607 12860608.

608 19. Scharf W, Schauer S, Freyburger F, Petrovec M, Schaarschmidt-Kiener D, Liebisch G, et  
609 al. Distinct host species correlate with *Anaplasma phagocytophilum ankA* gene clusters. J  
610 Clin Microbiol. 2011;49(3):790-796. <https://doi.org/10.1128/JCM.02051-10>. PMID:  
611 21177886.

612 20. Ravyn MD, Kodner CB, Carter SE, Jarnefeld JL, Johnson RC. Isolation of the etiologic  
613 agent of human granulocytic ehrlichiosis from the white-footed mouse (*Peromyscus*

- 614 *leucopus*). J Clin Microbiol. 2001;39(1):335-338. <https://doi.org/10.1128/JCM.39.1.335->  
615 338.2001. PMID: 11136794.
- 616 21. Telford SR, 3rd, Dawson JE. Persistent infection of C3H/HeJ mice by *Ehrlichia*  
617 *chaffeensis*. Vet Microbiol. 1996;52(1-2):103-112. <https://doi.org/10.1016/0378->  
618 1135(96)00064-8. PMID: 8914255.
- 619 22. Chae JS, Yu DH, Shringi S, Klein TA, Kim HC, Chong ST, et al. Microbial pathogens in  
620 ticks, rodents and a shrew in northern Gyeonggi-do near the DMZ, Korea. J Vet Sci.  
621 2008;9(3):285-293. <https://doi.org/10.4142/jvs.2008.9.3.285>. PMID: 18716449.
- 622 23. Kim CM, Yi YH, Yu DH, Lee MJ, Cho MR, Desai AR, et al. Tick-borne rickettsial  
623 pathogens in ticks and small mammals in Korea. Appl Environ Microbiol.  
624 2006;72(9):5766-5776. <https://doi.org/10.1128/AEM.00431-06>. PMID: 16957192.
- 625 24. Tolkacz K, Alsarraf M, Kowalec M, Dwuznik D, Grzybek M, Behnke JM, et al. *Bartonella*  
626 infections in three species of *Microtus*: prevalence and genetic diversity, vertical  
627 transmission and the effect of concurrent *Babesia microti* infection on its success. Parasit  
628 Vectors. 2018;11(1):491. <https://doi.org/10.1186/s13071-018-3047-6>. PMID: 30165879.
- 629 25. Kerkhoff FT, Bergmans AM, van Der Zee A, Rothova A. Demonstration of *Bartonella*  
630 *grahamii* DNA in ocular fluids of a patient with neuroretinitis. J Clin Microbiol.  
631 1999;37(12):4034-4038. <https://doi.org/10.1128/JCM.37.12.4034-4038.1999>. PMID:  
632 10565926.
- 633 26. Kosoy M, Murray M, Gilmore RD, Jr., Bai Y, Gage KL. *Bartonella* strains from ground  
634 squirrels are identical to *Bartonella washoensis* isolated from a human patient. J Clin  
635 Microbiol. 2003;41(2):645-650. <https://doi.org/10.1128/JCM.41.2.645-650.2003>. PMID:  
636 12574261.
- 637 27. Krugel M, Pfeffer M, Krol N, Imholt C, Baert K, Ulrich RG, et al. Rats as potential

- 638 reservoirs for neglected zoonotic *Bartonella* species in flanders, Belgium. *Parasit Vectors*.  
639 2020;13(1):235. <https://doi.org/10.1186/s13071-020-04098-y>. PMID: 32381113.
- 640 28. Oksi J, Rantala S, Kilpinen S, Silvennoinen R, Vornanen M, Veikkolainen V, et al. Cat  
641 scratch disease caused by *Bartonella grahamii* in an immunocompromised patient. *J Clin*  
642 *Microbiol*. 2013;51(8):2781-2784. <https://doi.org/10.1128/JCM.00910-13>. PMID:  
643 23740723.
- 644 29. Okaro U, Addisu A, Casanas B, Anderson B. *Bartonella* species, an emerging cause of  
645 blood-culture-negative endocarditis. *Clin Microbiol Rev*. 2017;30(3):709-746.  
646 <https://doi.org/10.1128/CMR.00013-17>. PMID: 28490579.
- 647 30. Goncalves LR, Favacho AR, Roque AL, Mendes NS, Fidelis Junior OL, Benevenuto JL,  
648 et al. Association of *Bartonella* species with wild and synanthropic rodents in different  
649 Brazilian Biomes. *Appl Environ Microbiol*. 2016;82(24):7154-7164.  
650 <https://doi.org/10.1128/AEM.02447-16>. PMID: 27736785.
- 651 31. Gutierrez R, Krasnov B, Morick D, Gottlieb Y, Khokhlova IS, Harrus S. *Bartonella*  
652 infection in rodents and their flea ectoparasites: an overview. *Vector Borne Zoonotic Dis*.  
653 2015;15(1):27-39. <https://doi.org/10.1089/vbz.2014.1606>. PMID: 25629778.
- 654 32. Muller A, Gutierrez R, Seguel M, Monti G, Otth C, Bittencourt P, et al. Molecular survey  
655 of *Bartonella* spp. in rodents and fleas from Chile. *Acta Trop*. 2020;212:105672.  
656 <https://doi.org/10.1016/j.actatropica.2020.105672>. PMID: 32835672.
- 657 33. Buffet JP, Kosoy M, Vayssier-Taussat M. Natural history of *Bartonella*-infecting rodents  
658 in light of new knowledge on genomics, diversity and evolution. *Future Microbiol*.  
659 2013;8(9):1117-1128. <https://doi.org/10.2217/fmb.13.77>. PMID: 24020740.
- 660 34. Knap N, Duh D, Birtles R, Trilar T, Petrovec M, Avsic-Zupanc T. Molecular detection of  
661 *Bartonella* species infecting rodents in Slovenia. *FEMS Immunol Med Microbiol*.

- 2007;50(1):45-50. <https://doi.org/10.1111/j.1574-695X.2007.00226.x>. PMID: 17374132.
- 663 35. Kosoy MY, Regnery RL, Tzianabos T, Marston EL, Jones DC, Green D, et al. Distribution,  
664 diversity, and host specificity of *Bartonella* in rodents from the southeastern United States.  
665 Am J Trop Med Hyg. 1997;57(5):578-588. <https://doi.org/10.4269/ajtmh.1997.57.578>.  
666 PMID: 9392599.
- 667 36. Pretorius AM, Beati L, Birtles RJ. Diversity of bartonellae associated with small mammals  
668 inhabiting free state province, South Africa. Int J Syst Evol Microbiol. 2004;54(Pt 6):1959-  
669 1967. <https://doi.org/10.1099/ijs.0.03033-0>. PMID: 15545418.
- 670 37. Polat C, Celebi B, Irmak S, Karatas A, Colak F, Matur F, et al. Characterization of  
671 *Bartonella taylorii* strains in small mammals of the Turkish Thrace. Ecohealth.  
672 2020;17(4):477-486. <https://doi.org/10.1007/s10393-021-01518-y>. PMID: 33788082.
- 673 38. Qin XR, Liu JW, Yu H, Yu XJ. *Bartonella* species detected in rodents from eastern China.  
674 Vector Borne Zoonotic Dis. 2019;19(11):810-814. <https://doi.org/10.1089/vbz.2018.2410>.  
675 PMID: 31355717.
- 676 39. Rodriguez-Pastor R, Escudero R, Lambin X, Vidal MD, Gil H, Jado I, et al. Zoonotic  
677 pathogens in fluctuating common vole (*Microtus arvalis*) populations: occurrence and  
678 dynamics. Parasitology. 2019;146(3):389-398.  
679 <https://doi.org/10.1017/S0031182018001543>. PMID: 30246665.
- 680 40. Rothenburger JL, Himsworth CG, Nemeth NM, Pearl DL, Jardine CM. Beyond abundance:  
681 How microenvironmental features and weather influence *Bartonella tribocorum* infection  
682 in wild Norway rats (*Rattus norvegicus*). Zoonoses Public Health. 2018;65(3):339-351.  
683 <https://doi.org/10.1111/zph.12440>. PMID: 29274119.
- 684 41. Silaghi C, Pfeffer M, Kiefer D, Kiefer M, Obiegala A. *Bartonella*, rodents, fleas and ticks:  
685 a molecular field study on host-vector-pathogen associations in Saxony, Eastern Germany.

- 686 Microb Ecol. 2016;72(4):965-974. <https://doi.org/10.1007/s00248-016-0787-8>. PMID:  
687 27220973.
- 688 42. Kim CM, Kim JY, Yi YH, Lee MJ, Cho MR, Shah DH, et al. Detection of *Bartonella*  
689 species from ticks, mites and small mammals in Korea. J Vet Sci. 2005;6(4):327-334.  
690 PMID: 16293997.
- 691 43. Ko S, Kang JG, Kim HC, Klein TA, Choi KS, Song JW, et al. Prevalence, isolation and  
692 molecular characterization of *Bartonella* species in Republic of Korea. Transbound Emerg  
693 Dis. 2016;63(1):56-67. <https://doi.org/10.1111/tbed.12217>. PMID: 24661833.
- 694 44. Zhong X, Nouri M, Raberg L. Colonization and pathology of *Borrelia afzelii* in its natural  
695 hosts. Ticks Tick Borne Dis. 2019;10(4):822-827.  
696 <https://doi.org/10.1016/j.ttbdis.2019.03.017>. PMID: 31005618.
- 697 45. Kurtenbach K, Hanincova K, Tsao JI, Margos G, Fish D, Ogden NH. Fundamental  
698 processes in the evolutionary ecology of Lyme borreliosis. Nat Rev Microbiol.  
699 2006;4(9):660-669. <https://doi.org/10.1038/nrmicro1475>. PMID: 16894341.
- 700 46. Stanek G, Reiter M. The expanding Lyme *Borrelia* complex--clinical significance of  
701 genomic species? Clin Microbiol Infect. 2011;17(4):487-493.  
702 <https://doi.org/10.1111/j.1469-0691.2011.03492.x>. PMID: 21414082.
- 703 47. Rollins RE, Yeyin Z, Wyczanska M, Alig N, Hepner S, Fingerle V, et al. Spatial variability  
704 in prevalence and genospecies distributions of *Borrelia burgdorferi* sensu lato from ixodid  
705 ticks collected in southern Germany. Ticks Tick Borne Dis. 2021;12(1):101589.  
706 <https://doi.org/10.1016/j.ttbdis.2020.101589>. PMID: 33096511.
- 707 48. Balmelli T, Piffaretti JC. Association between different clinical manifestations of Lyme  
708 disease and different species of *Borrelia burgdorferi* sensu lato. Res Microbiol.  
709 1995;146(4):329-340. [https://doi.org/10.1016/0923-2508\(96\)81056-4](https://doi.org/10.1016/0923-2508(96)81056-4). PMID: 7569327.

- 710 49. Wang G, van Dam AP, Schwartz I, Dankert J. Molecular typing of *Borrelia burgdorferi*  
711 sensu lato: taxonomic, epidemiological, and clinical implications. Clin Microbiol Rev.  
712 1999;12(4):633-653. <https://doi.org/10.1128/CMR.12.4.633>. PMID: 10515907.
- 713 50. Scheffold N, Herkommer B, Kandolf R, May AE. Lyme carditis--diagnosis, treatment and  
714 prognosis. Dtsch Arztebl Int. 2015;112(12):202-208.  
715 <https://doi.org/10.3238/arztebl.2015.0202>. PMID: 25838022.
- 716 51. Kee S, Hwang KJ, Oh HB, Park KS. Identification of *Borrelia burgdorferi* isolated in  
717 Korea using outer surface protein A (*OspA*) serotyping system. Microbiol Immunol.  
718 1994;38(12):989-993. <https://doi.org/10.1111/j.1348-0421.1994.tb02157.x>. PMID:  
719 7723693.
- 720 52. Bell DR, Berghaus RD, Patel S, Beavers S, Fernandez I, Sanchez S. Seroprevalence of  
721 tick-borne infections in military working dogs in the Republic of Korea. Vector Borne  
722 Zoonotic Dis. 2012;12(12):1023-1030. <https://doi.org/10.1089/vbz.2011.0864>. PMID:  
723 23167501.
- 724 53. Lee SH, Yun SH, Choi E, Park YS, Lee SE, Cho GJ, et al. Serological detection of *Borrelia*  
725 *burgdorferi* among horses in Korea. Korean J Parasitol. 2016;54(1):97-101.  
726 <https://doi.org/10.3347/kjp.2016.54.1.97>. PMID: 26951987.
- 727 54. VanBik D, Lee SH, Seo MG, Jeon BR, Goo YK, Park SJ, et al. *Borrelia* species detected  
728 in ticks feeding on wild Korean Water Deer (*Hydropotes inermis*) using molecular and  
729 genotypic analyses. J Med Entomol. 2017;54(5):1397-1402.  
730 <https://doi.org/10.1093/jme/tjx106>. PMID: 28549151.
- 731 55. Moon S, Hong Y, Hwang KJ, Kim S, Eom J, Kwon D, et al. Epidemiological features and  
732 clinical manifestations of Lyme borreliosis in Korea during the period 2005-2012. Jpn J  
733 Infect Dis. 2015;68(1):1-4. <https://doi.org/10.7883/yoken.JJID.2013.462>. PMID:

- 734 25420645.
- 735 56. Kim CM, Park SY, Kim DM, Park JW, Chung JK. First report of *Borrelia burgdorferi*  
736 sensu stricto detection in a commune genospecies in *Apodemus agrarius* in Gwangju,  
737 South Korea. *Sci Rep.* 2021;11(1):18199. <https://doi.org/10.1038/s41598-021-97411-3>.  
738 PMID: 34521873.
- 739 57. Cho HC, Hwang S, Kim EM, Park YJ, Shin SU, Jang DH, et al. Prevalence and molecular  
740 characterization of *Coxiella burnetii* in cattle, goats, and horses in the Republic of Korea.  
741 *Vector Borne Zoonotic Dis.* 2021;21(7):502-508. <https://doi.org/10.1089/vbz.2020.2764>.  
742 PMID: 33844947.
- 743 58. Abdel-Moein KA, Hamza DA. Rat as an overlooked reservoir for *Coxiella burnetii*: a  
744 public health implication. *Comp Immunol Microbiol Infect Dis.* 2018;61:30-33.  
745 <https://doi.org/10.1016/j.cimid.2018.11.002>. PMID: 30502830.
- 746 59. Chochlakis D, Santos AS, Giadinis ND, Papadopoulos D, Boubaris L, Kalaitzakis E, et al.  
747 Genotyping of *Coxiella burnetii* in sheep and goat abortion samples. *BMC Microbiol.*  
748 2018;18(1):204. <https://doi.org/10.1186/s12866-018-1353-y>. PMID: 30514233.
- 749 60. Madariaga MG, Rezai K, Trenholme GM, Weinstein RA. Q fever: a biological weapon in  
750 your backyard. *Lancet Infect Dis.* 2003;3(11):709-721. [https://doi.org/10.1016/s1473-3099\(03\)00804-1](https://doi.org/10.1016/s1473-3099(03)00804-1). PMID: 14592601.
- 752 61. Pascucci I, Di Domenico M, Dall'Acqua F, Sozio G, Camma C. Detection of lyme disease  
753 and Q fever agents in wild rodents in central Italy. *Vector Borne Zoonotic Dis.*  
754 2015;15(7):404-411. <https://doi.org/10.1089/vbz.2015.1807>. PMID: 26134933.
- 755 62. Hwang S, Cho HC, Shin SU, Kim HY, Park YJ, Jang DH, et al. Seroprevalence and  
756 molecular characterization of *Coxiella burnetii* in cattle in the Republic of Korea.  
757 *Pathogens.* 2020;9(11):890. <https://doi.org/10.3390/pathogens9110890>. PMID: 33121031.

- 758 63. Esteves LM, Bulhoes SM, Branco CC, Carreira T, Vieira ML, Gomes-Solecki M, et al.  
759 Diagnosis of human leptospirosis in a clinical setting: real-time PCR high resolution  
760 melting analysis for detection of *Leptospira* at the onset of disease. *Sci Rep*.  
761 2018;8(1):9213. <https://doi.org/10.1038/s41598-018-27555-2>. PMID: 29907838.
- 762 64. Karpagam KB, Ganesh B. Leptospirosis: a neglected tropical zoonotic infection of public  
763 health importance-an updated review. *Eur J Clin Microbiol Infect Dis*. 2020;39(5):835-  
764 846. <https://doi.org/10.1007/s10096-019-03797-4>. PMID: 31898795.
- 765 65. Lopez-Osorio S, Molano DA, Lopez-Arias A, Rodriguez-Osorio N, Zambrano C,  
766 Chaparro-Gutierrez JJ. Seroprevalence and molecular characterization of *Leptospira* spp.  
767 in rats captured near pig farms in Colombia. *Int J Environ Res Public Health*.  
768 2022;19(18):11539. <https://doi.org/10.3390/ijerph191811539>. PMID: 36141812.
- 769 66. Bharti AR, Nally JE, Ricaldi JN, Matthias MA, Diaz MM, Lovett MA, et al. Leptospirosis:  
770 a zoonotic disease of global importance. *Lancet Infect Dis*. 2003;3(12):757-771.  
771 [https://doi.org/10.1016/s1473-3099\(03\)00830-2](https://doi.org/10.1016/s1473-3099(03)00830-2). PMID: 14652202.
- 772 67. Ko AI, Goarant C, Picardeau M. *Leptospira*: the dawn of the molecular genetics era for an  
773 emerging zoonotic pathogen. *Nat Rev Microbiol*. 2009;7(10):736-747.  
774 <https://doi.org/10.1038/nrmicro2208>. PMID: 19756012.
- 775 68. Ellis WA. Animal leptospirosis. *Curr Top Microbiol Immunol*. 2015;387:99-137.  
776 [https://doi.org/10.1007/978-3-662-45059-8\\_6](https://doi.org/10.1007/978-3-662-45059-8_6). PMID: 25388134.
- 777 69. Levett PN. Leptospirosis. *Clin Microbiol Rev*. 2001;14(2):296-326.  
778 <https://doi.org/10.1128/CMR.14.2.296-326.2001>. PMID: 11292640.
- 779 70. Lau CL, Smythe LD, Craig SB, Weinstein P. Climate change, flooding, urbanisation and  
780 leptospirosis: fuelling the fire? *Trans R Soc Trop Med Hyg*. 2010;104(10):631-638.  
781 <https://doi.org/10.1016/j.trstmh.2010.07.002>. PMID: 20813388.



- 782 71. Schonning MH, Phelps MD, Warnasekara J, Agampodi SB, Furu P. A case-control study  
783 of environmental and occupational risks of leptospirosis in Sri Lanka. *Ecohealth*.  
784 2019;16(3):534-543. <https://doi.org/10.1007/s10393-019-01448-w>. PMID: 31664587.
- 785 72. Boey K, Shiokawa K, Rajeev S. *Leptospira* infection in rats: a literature review of global  
786 prevalence and distribution. *PLoS Negl Trop Dis*. 2019;13(8):e0007499.  
787 <https://doi.org/10.1371/journal.pntd.0007499>. PMID: 31398190.
- 788 73. Thaipadungpanit J, Wuthiekanun V, Chierakul W, Smythe LD, Petkanchanapong W,  
789 Limpai boon R, et al. A dominant clone of *Leptospira interrogans* associated with an  
790 outbreak of human leptospirosis in Thailand. *PLoS Negl Trop Dis*. 2007;1(1):e56.  
791 <https://doi.org/10.1371/journal.pntd.0000056>. PMID: 17989782.
- 792 74. Yu XJ, Liang MF, Zhang SY, Liu Y, Li JD, Sun YL, et al. Fever with thrombocytopenia  
793 associated with a novel bunyavirus in China. *N Engl J Med*. 2011;364(16):1523-1532.  
794 <https://doi.org/10.1056/NEJMoa1010095>. PMID: 21410387.
- 795 75. Kim KH, Yi J, Kim G, Choi SJ, Jun KI, Kim NH, et al. Severe fever with thrombocytopenia  
796 syndrome, South Korea, 2012. *Emerg Infect Dis*. 2013;19(11):1892-1894.  
797 <https://doi.org/10.3201/eid1911.130792>. PMID: 24206586.
- 798 76. Takahashi T, Maeda K, Suzuki T, Ishido A, Shigeoka T, Tominaga T, et al. The first  
799 identification and retrospective study of severe fever with thrombocytopenia syndrome in  
800 Japan. *J Infect Dis*. 2014;209(6):816-827. <https://doi.org/10.1093/infdis/jit603>. PMID:  
801 24231186.
- 802 77. Tran XC, Yun Y, Van An L, Kim SH, Thao NTP, Man PKC, et al. Endemic severe fever  
803 with thrombocytopenia syndrome, Vietnam. *Emerg Infect Dis*. 2019;25(5):1029-1031.  
804 <https://doi.org/10.3201/eid2505.181463>. PMID: 31002059.
- 805 78. Lin TL, Ou SC, Maeda K, Shimoda H, Chan JP, Tu WC, et al. The first discovery of severe

- 806 fever with thrombocytopenia syndrome virus in Taiwan. *Emerg Microbes Infect.*  
807 2020;9(1):148-151. <https://doi.org/10.1080/22221751.2019.1710436>. PMID: 31918622.
- 808 79. Liu JW, Zhao L, Luo LM, Liu MM, Sun Y, Su X, et al. Molecular evolution and spatial  
809 transmission of severe fever with thrombocytopenia syndrome virus based on complete  
810 genome sequences. *PLoS One.* 2016;11(3):e0151677.  
811 <https://doi.org/10.1371/journal.pone.0151677>. PMID: 26999664.
- 812 80. Bao CJ, Guo XL, Qi X, Hu JL, Zhou MH, Varma JK, et al. A family cluster of infections  
813 by a newly recognized bunyavirus in eastern China, 2007: further evidence of person-to-  
814 person transmission. *Clin Infect Dis.* 2011;53(12):1208-1214.  
815 <https://doi.org/10.1093/cid/cir732>. PMID: 22028437.
- 816 81. Mehand MS, Millett P, Al-Shorbaji F, Roth C, Kieny MP, Murgue B. World health  
817 organization methodology to prioritize emerging infectious diseases in need of research  
818 and development. *Emerg Infect Dis.* 2018;24(9):e171427.  
819 <https://doi.org/10.3201/eid2409.171427>. PMID: 30124424.
- 820 82. Cheng J, Zhang L, Hu B, Wang Q, Wu R, Zhan F, et al. Prevalence and molecular  
821 phylogenetic analysis of severe fever with thrombocytopenia syndrome virus in domestic  
822 animals and rodents in Hubei Province, China. *Virol Sin.* 2019;34(5):596-600.  
823 <https://doi.org/10.1007/s12250-019-00119-y>. PMID: 31161553.
- 824 83. Choi SJ, Park SW, Bae IG, Kim SH, Ryu SY, Kim HA, et al. Severe fever with  
825 thrombocytopenia syndrome in South Korea, 2013-2015. *PLoS Negl Trop Dis.*  
826 2016;10(12):e0005264. <https://doi.org/10.1371/journal.pntd.0005264>. PMID: 28033338.
- 827 84. Kobayashi Y, Kato H, Yamagishi T, Shimada T, Matsui T, Yoshikawa T, et al. Severe fever  
828 with thrombocytopenia syndrome, Japan, 2013-2017. *Emerg Infect Dis.* 2020;26(4):692-  
829 699. <https://doi.org/10.3201/eid2604.191011>. PMID: 32186502.

- 830 85. Dumler JS. The biological basis of severe outcomes in *Anaplasma phagocytophilum*  
831 infection. FEMS Immunol Med Microbiol. 2012;64(1):13-20.  
832 <https://doi.org/10.1111/j.1574-695X.2011.00909.x>. PMID: 22098465.
- 833 86. Stuen S, Granquist EG, Silaghi C. *Anaplasma phagocytophilum*--a widespread multi-host  
834 pathogen with highly adaptive strategies. Front Cell Infect Microbiol. 2013;3:31.  
835 <https://doi.org/10.3389/fcimb.2013.00031>. PMID: 23885337.
- 836 87. Bang MS, Kim CM, Park JW, Chung JK, Kim DM, Yun NR. Prevalence of *Orientia*  
837 *tsutsugamushi*, *Anaplasma phagocytophilum* and *Leptospira interrogans* in striped field  
838 mice in Gwangju, Republic of Korea. PLoS One. 2019;14(8):e0215526.  
839 <https://doi.org/10.1371/journal.pone.0215526>. PMID: 31419222.
- 840 88. Zheng W, Liu Y, Tao H, Li Z, Xuan X, Liu X, et al. First Molecular evidence of *Anaplasma*  
841 *phagocytophilum* in rodent populations of Nanchang, China. Jpn J Infect Dis.  
842 2018;71(2):129-133. <https://doi.org/10.7883/yoken.JJID.2017.301>. PMID: 29491242.
- 843 89. Massung RF, Mauel MJ, Owens JH, Allan N, Courtney JW, Stafford KC, 3rd, et al. Genetic  
844 variants of *Ehrlichia phagocytophila*, Rhode Island and Connecticut. Emerg Infect Dis.  
845 2002;8(5):467-472. <https://doi.org/10.3201/eid0805.010251>. PMID: 11996680.
- 846 90. Lipatova I, Paulauskas A, Puraite I, Radzijeuskaja J, Balciauskas L, Gedminas V.  
847 *Bartonella* infection in small mammals and their ectoparasites in Lithuania. Microbes  
848 Infect. 2015;17(11-12):884-888. <https://doi.org/10.1016/j.micinf.2015.08.013>. PMID:  
849 26344603.
- 850 91. Pangjai D, Maruyama S, Boonmar S, Kabeya H, Sato S, Nimsuphan B, et al. Prevalence  
851 of zoonotic *Bartonella* species among rodents and shrews in Thailand. Comp Immunol  
852 Microbiol Infect Dis. 2014;37(2):109-114. <https://doi.org/10.1016/j.cimid.2013.12.001>.  
853 PMID: 24393304.

- 854 92. Malania L, Bai Y, Osikowicz LM, Tsertsvadze N, Katsitadze G, Imnadze P, et al.  
855 Prevalence and diversity of *Bartonella* species in rodents from Georgia (Caucasus). *Am J*  
856 *Trop Med Hyg.* 2016;95(2):466-471. <https://doi.org/10.4269/ajtmh.16-0041>. PMID:  
857 27162268.
- 858 93. Rozental T, Ferreira MS, Guterres A, Mares-Guia MA, Teixeira BR, Goncalves J, et al.  
859 Zoonotic pathogens in Atlantic Forest wild rodents in Brazil: *Bartonella* and *Coxiella*  
860 infections. *Acta Trop.* 2017;168:64-73. <https://doi.org/10.1016/j.actatropica.2017.01.003>.  
861 PMID: 28077317.
- 862 94. Bai Y, Kosoy MY, Lerthusnee K, Peruski LF, Richardson JH. Prevalence and genetic  
863 heterogeneity of *Bartonella* strains cultured from rodents from 17 provinces in Thailand.  
864 *Am J Trop Med Hyg.* 2009;81(5):811-816. <https://doi.org/10.4269/ajtmh.2009.09-0294>.  
865 PMID: 19861616.
- 866 95. Gundi VA, Billeter SA, Rood MP, Kosoy MY. *Bartonella* spp. in rats and zoonoses, Los  
867 Angeles, California, USA. *Emerg Infect Dis.* 2012;18(4):631-633.  
868 <https://doi.org/10.3201/eid1804.110816>. PMID: 22469313.
- 869 96. Su Q, Chen Y, Wang B, Huang C, Han S, Yuan G, et al. Epidemiology and genetic diversity  
870 of zoonotic pathogens in urban rats (*Rattus* spp.) from a subtropical city, Guangzhou,  
871 southern China. *Zoonoses Public Health.* 2020;67(5):534-545.  
872 <https://doi.org/10.1111/zph.12717>. PMID: 32452163.
- 873 97. Kim SY, Kim TK, Kim TY, Lee HI. Geographical Distribution of *Borrelia burgdorferi*  
874 sensu lato in ticks collected from wild rodents in the Republic of Korea. *Pathogens.*  
875 2020;9(11):866. <https://doi.org/10.3390/pathogens9110866>. PMID: 33105824.
- 876 98. Khanakah G, Kocianova E, Vyrostekova V, Rehacek J, Kundi M, Stanek G. Seasonal  
877 variations in detecting *Borrelia burgdorferi* sensu lato in rodents from north eastern

- 878 Austria. Wien Klin Wochenschr. 2006;118(23-24):754-758.  
879 <https://doi.org/10.1007/s00508-006-0730-y>. PMID: 17186171.
- 880 99. Kybicova K, Kurzova Z, Hulinska D. Molecular and serological evidence of *Borrelia*  
881 *burgdorferi* sensu lato in wild rodents in the Czech Republic. Vector Borne Zoonotic Dis.  
882 2008;8(5):645-652. <https://doi.org/10.1089/vbz.2007.0249>. PMID: 18454596.
- 883 100. Barandika JF, Hurtado A, Garcia-Esteban C, Gil H, Escudero R, Barral M, et al. Tick-  
884 borne zoonotic bacteria in wild and domestic small mammals in northern Spain. Appl  
885 Environ Microbiol. 2007;73(19):6166-6171. <https://doi.org/10.1128/AEM.00590-07>.  
886 PMID: 17693556.
- 887 101. Moon S, Gwack J, Hwang KJ, Kwon D, Kim S, Noh Y, et al. Autochthonous lyme  
888 borreliosis in humans and ticks in Korea. Osong Public Health and Research Perspectives.  
889 2013;4(1):52-56.
- 890 102. Hanincova K, Schafer SM, Etti S, Sewell HS, Taragelova V, Ziak D, et al. Association of  
891 *Borrelia afzelii* with rodents in Europe. Parasitology. 2003;126(Pt 1):11-20.  
892 <https://doi.org/10.1017/s0031182002002548>. PMID: 12613759.
- 893 103. Seo MG, Kwon OD, Kwak D. Molecular Identification of *Borrelia afzelii* from ticks  
894 parasitizing domestic and wild animals in South Korea. Microorganisms. 2020;8(5):649.  
895 <https://doi.org/10.3390/microorganisms8050649>. PMID: 32365723.
- 896 104. Choi YJ, Han SH, Park JM, Lee KM, Lee EM, Lee SH, et al. First molecular detection of  
897 *Borrelia afzelii* in clinical samples in Korea. Microbiol Immunol. 2007;51(12):1201-1207.  
898 <https://doi.org/10.1111/j.1348-0421.2007.tb04015.x>. PMID: 18094538.
- 899 105. Liu L, Baoliang X, Yingqun F, Ming L, Yu Y, Yong H, et al. *Coxiella burnetii* in rodents  
900 on Heixiazi Island at the Sino-Russian border. Am J Trop Med Hyg. 2013;88(4):770-773.  
901 <https://doi.org/10.4269/ajtmh.12-0580>. PMID: 23382172.

- 902 106. Mangombi-Pambou J, Granjon L, Labarrere C, Kane M, Niang Y, Fournier PE, et al. New  
903 Genotype of *Coxiella burnetii* causing epizootic Q fever outbreak in rodents, northern  
904 Senegal. *Emerg Infect Dis.* 2023;29(5):1078-1081.  
905 <https://doi.org/10.3201/eid2905.221034>. PMID: 37081672.
- 906 107. Chitanga S, Simulundu E, Simuunza MC, Changula K, Qiu Y, Kajihara M, et al. First  
907 molecular detection and genetic characterization of *Coxiella burnetii* in Zambian dogs and  
908 rodents. *Parasit Vectors.* 2018;11(1):40. <https://doi.org/10.1186/s13071-018-2629-7>.  
909 PMID: 29343277.
- 910 108. Yoo JR, Kim MS, Heo ST, Oh HJ, Oh JH, Ko SY, et al. Seroreactivity to *Coxiella burnetii*  
911 in an agricultural population and prevalence of *Coxiella burnetii* infection in ticks of a  
912 non-endemic region for Q fever in South Korea. *Pathogens.* 2021;10(10):1337.  
913 <https://doi.org/10.3390/pathogens10101337>. PMID: 34684286.
- 914 109. Truong AT, Yun BR, Lim J, Min S, Yoo MS, Yoon SS, et al. Real-time PCR biochip for  
915 on-site detection of *Coxiella burnetii* in ticks. *Parasit Vectors.* 2021;14(1):239.  
916 <https://doi.org/10.1186/s13071-021-04744-z>. PMID: 33957987.
- 917 110. Yoo JR, Heo ST, Kim M, Kim M, Kang MJ, Kim ET, et al. Coinfection of severe fever  
918 with thrombocytopenia syndrome virus and *Coxiella burnetii* in developmental stage of  
919 hard ticks in subtropical region of Korea. *J Korean Med Sci.* 2023;38(20):e156.  
920 <https://doi.org/10.3346/jkms.2023.38.e156>. PMID: 37218355.
- 921 111. Kim JH, Choi YJ, Lee KS, Kim JE, Oh JW, Moon JH. Severe fever with thrombocytopenia  
922 syndrome with Q fever coinfection in an 8-year-old girl. *Pediatr Infect Dis J.*  
923 2021;40(1):e31-e34. <https://doi.org/10.1097/INF.0000000000002948>. PMID: 33105338.
- 924 112. Yim EK, Kim YW, Lee JS, Chang IA, Baek LJ, Song JW, et al. Detection of leptospiral  
925 DNA from field rodents by PCR. *J Bacteriol Virol.* 2003:177-181.

- 926 113. Dobigny G, Garba M, Tatard C, Loiseau A, Galan M, Kadaoure I, et al. Urban market  
927 gardening and rodent-borne pathogenic *Leptospira* in arid zones: a case study in niamey,  
928 Niger. PLoS Negl Trop Dis. 2015;9(10):e0004097. [https://doi.org/](https://doi.org/10.1371/journal.pntd.0004097)  
929 10.1371/journal.pntd.0004097. PMID: 26437456.
- 930 114. Samir A, Soliman R, El-Hariri M, Abdel-Moein K, Hatem ME. Leptospirosis in animals  
931 and human contacts in Egypt: broad range surveillance. Rev Soc Bras Med Trop.  
932 2015;48(3):272-277. <https://doi.org/10.1590/0037-8682-0102-2015>. PMID: 26108004.
- 933 115. Halliday JEB, Knobel DL, Allan KJ, de CBBM, Handel I, Agwanda B, et al. Urban  
934 leptospirosis in Africa: a cross-sectional survey of *Leptospira* infection in rodents in the  
935 Kibera urban settlement, Nairobi, Kenya. Am J Trop Med Hyg. 2013;89(6):1095-1102.  
936 <https://doi.org/10.4269/ajtmh.13-0415>. PMID: 24080637.
- 937 116. Izquierdo-Rodriguez E, Fernandez-Alvarez A, Martin-Carrillo N, Marchand B, Feliu C,  
938 Miquel J, et al. Pathogenic *Leptospira* species in rodents from Corsica (France). PLoS  
939 One. 2020;15(6):e0233776. <https://doi.org/10.1371/journal.pone.0233776>. PMID:  
940 32502160.
- 941 117. Vitale M, Agnello S, Chetta M, Amato B, Vitale G, Bella CD, et al. Human leptospirosis  
942 cases in Palermo Italy. The role of rodents and climate. J Infect Public Health.  
943 2018;11(2):209-214. <https://doi.org/10.1016/j.jiph.2017.07.024>. PMID: 28802826.
- 944 118. Cho MK, Kee SH, Song HJ, Kim KH, Song KJ, Baek LJ, et al. Infection rate of *Leptospira*  
945 *interrogans* in the field rodent, *Apodemus agrarius*, in Korea. Epidemiol Infect.  
946 1998;121(3):685-690. <https://doi.org/10.1017/s0950268898001691>. PMID: 10030719.
- 947 119. Gu XL, Su WQ, Zhou CM, Fang LZ, Zhu K, Ma DQ, et al. SFTSV infection in rodents  
948 and their ectoparasitic chiggers. PLoS Negl Trop Dis. 2022;16(8):e0010698.  
949 <https://doi.org/10.1371/journal.pntd.0010698>. PMID: 36037170.

- 950 120. Rim JM, Han SW, Cho YK, Kang JG, Choi KS, Jeong H, et al. Survey of severe fever  
951 with thrombocytopenia syndrome virus in wild boar in the Republic of Korea. *Ticks Tick*  
952 *Borne Dis.* 2021;12(6):101813. <https://doi.org/10.1016/j.ttbdis.2021.101813>. PMID:  
953 34411795.
- 954 121. Kang JG, Cho YK, Jo YS, Han SW, Chae JB, Park JE, et al. Severe fever with  
955 thrombocytopenia syndrome virus in ticks in the Republic of Korea. *Korean J Parasitol.*  
956 2022;60(1):65-71. <https://doi.org/10.3347/kjp.2022.60.1.65>. PMID: 35247957.
- 957 122. Kang JG, Cho YK, Han SW, Jeon K, Choi H, Kim JH, et al. Molecular and serological  
958 investigation of severe fever with thrombocytopenia syndrome virus in cats. *Vector Borne*  
959 *Zoonotic Dis.* 2020;20(12):916-920. <https://doi.org/10.1089/vbz.2020.2649>. PMID:  
960 32831006.
- 961 123. Kang JG, Cho YK, Jo YS, Chae JB, Joo YH, Park KW, et al. Severe fever with  
962 thrombocytopenia syndrome virus in dogs, South Korea. *Emerg Infect Dis.*  
963 2019;25(2):376-378. <https://doi.org/10.3201/eid2502.180859>. PMID: 30666951.
- 964 124. Kang JG, Oh SS, Jo YS, Chae JB, Cho YK, Chae JS. Molecular detection of severe fever  
965 with thrombocytopenia syndrome virus in Korean domesticated pigs. *Vector Borne*  
966 *Zoonotic Dis.* 2018;18(8):450-452. <https://doi.org/10.1089/vbz.2018.2310>. PMID:  
967 29893622.
- 968 125. Kang JG, Cho YK, Jo YS, Chae JB, Oh SS, Kim KH, et al. Prevalence of severe fever  
969 with thrombocytopenia syndrome virus in black goats (*Capra hircus coreanae*) in the  
970 Republic of Korea. *Ticks Tick Borne Dis.* 2018;9(5):1153-1157.  
971 <https://doi.org/10.1016/j.ttbdis.2018.04.018>. PMID: 29724620.
- 972 126. Oh SS, Chae JB, Kang JG, Kim HC, Chong ST, Shin JH, et al. Detection of severe fever  
973 with thrombocytopenia syndrome virus from wild animals and *Ixodidae* ticks in the



974 Republic of Korea. Vector Borne Zoonotic Dis. 2016;16(6):408-414.  
975 <https://doi.org/10.1089/vbz.2015.1848>. PMID: 27043361.

976 127. Hwang J, Kang JG, Oh SS, Chae JB, Cho YK, Cho YS, et al. Molecular detection of  
977 severe fever with thrombocytopenia syndrome virus (SFTSV) in feral cats from Seoul,  
978 Korea. Ticks Tick Borne Dis. 2017;8(1):9-12.  
979 <https://doi.org/10.1016/j.ttbdis.2016.08.005>. PMID: 27542506.

980 128. Tsuru M, Suzuki T, Murakami T, Matsui K, Maeda Y, Yoshikawa T, et al. Pathological  
981 characteristics of a patient with severe fever with thrombocytopenia syndrome (SFTS)  
982 infected with SFTS Virus through a sick cat's bite. Viruses. 2021;13(2):204.  
983 <https://doi.org/10.3390/v13020204>. PMID: 33572914.

984 129. Kida K, Matsuoka Y, Shimoda T, Matsuoka H, Yamada H, Saito T, et al. A case of cat-to-  
985 human transmission of severe fever with thrombocytopenia syndrome virus. Jpn J Infect  
986 Dis. 2019;72(5):356-358. <https://doi.org/10.7883/yoken.JJID.2018.526>. PMID:  
987 31366857.

988 130. Seo JW, Kim D, Yun N, Kim DM. Clinical update of severe fever with thrombocytopenia  
989 syndrome. Viruses. 2021;13(7):1213. <https://doi.org/10.3390/v13071213>. PMID:  
990 34201811.

991 131. Yun SM, Park SJ, Kim YI, Park SW, Yu MA, Kwon HI, et al. Genetic and pathogenic  
992 diversity of severe fever with thrombocytopenia syndrome virus (SFTSV) in South Korea.  
993 JCI Insight. 2020;5(2):e129531. <https://doi.org/10.1172/jci.insight.129531>. PMID:  
994 31877113.

995

996 **Figure legends**

997 **Fig 1.** Maps showing the regions where rodent-borne pathogens were detected in the Republic  
998 of Korea. Marks are differently indicated according to each pathogen.

999 **Fig 2.** Phylogenetic tree inferred by maximum-likelihood analysis using the K2 + G model of  
1000 16S rRNA gene sequence of *Anaplasma phagocytophilum*. The numbers at the nodes are  
1001 bootstrap values expressed as percentage of 1000 replicates. Scale bar indicates nucleotide  
1002 substitution per site. Samples sequenced from *Apodemus agrarius* are shown in filled circles.

1003 **Fig 3.** Phylogenetic analysis based on *ITS* region of *Bartonella* spp. (maximum-likelihood  
1004 analysis using the Tamura 3-parameter + G + I model with of 1000 replicates). Scale bar  
1005 indicates nucleotide substitution per site. Sequences determined from *Apodemus agrarius* are  
1006 indicated in filled circles.

1007 **Fig 4.** Maximum-likelihood phylogenetic tree using the Tamura-Nei model based on *ospA* gene  
1008 of *Borrelia* spp. Bootstrap values were calculated with 1000 replicates of the alignment. Scale  
1009 bar indicates nucleotide substitution per site. Sequences obtained from *Apodemus agrarius* are  
1010 symbolized in filled circles.

1011 **Fig 5.** Maximum-likelihood phylogenetic tree from *IS1111* gene of *Coxiella burnetii*. The  
1012 evolutionary analysis was inferred using the Kimura 2-parameter model. Bootstrap values  
1013 (1000 replicates) are indicated in each node. Scale bar implies nucleotide substitution per site.  
1014 Sequences determined from *Apodemus agrarius* are highlighted in filled circles.

1015 **Fig 6.** Phylogenetic analysis based on *rpoB* gene of *Leptospira interrogans*. The tree was  
1016 inferred in MEGA X using maximum-likelihood and Kimura 2-parameter with 1000 replicates.  
1017 Scale bar implies nucleotide substitution per site. Sequences obtained from *Apodemus agrarius*  
1018 are shown in filled circles.

1019 **Fig 7.** Phylogenetic tree of the severe fever with thrombocytopenia syndrome virus based on

1020 the analysis of partial sequences of small segments. Maximum-likelihood analysis was used to  
1021 construct by the Kimura 2-parameter model (1000 bootstrap replicates). Scale bar implies  
1022 nucleotide substitution per site. The sequences identified from *Apodemus agrarius* are  
1023 indicated in filled circles.  
1024

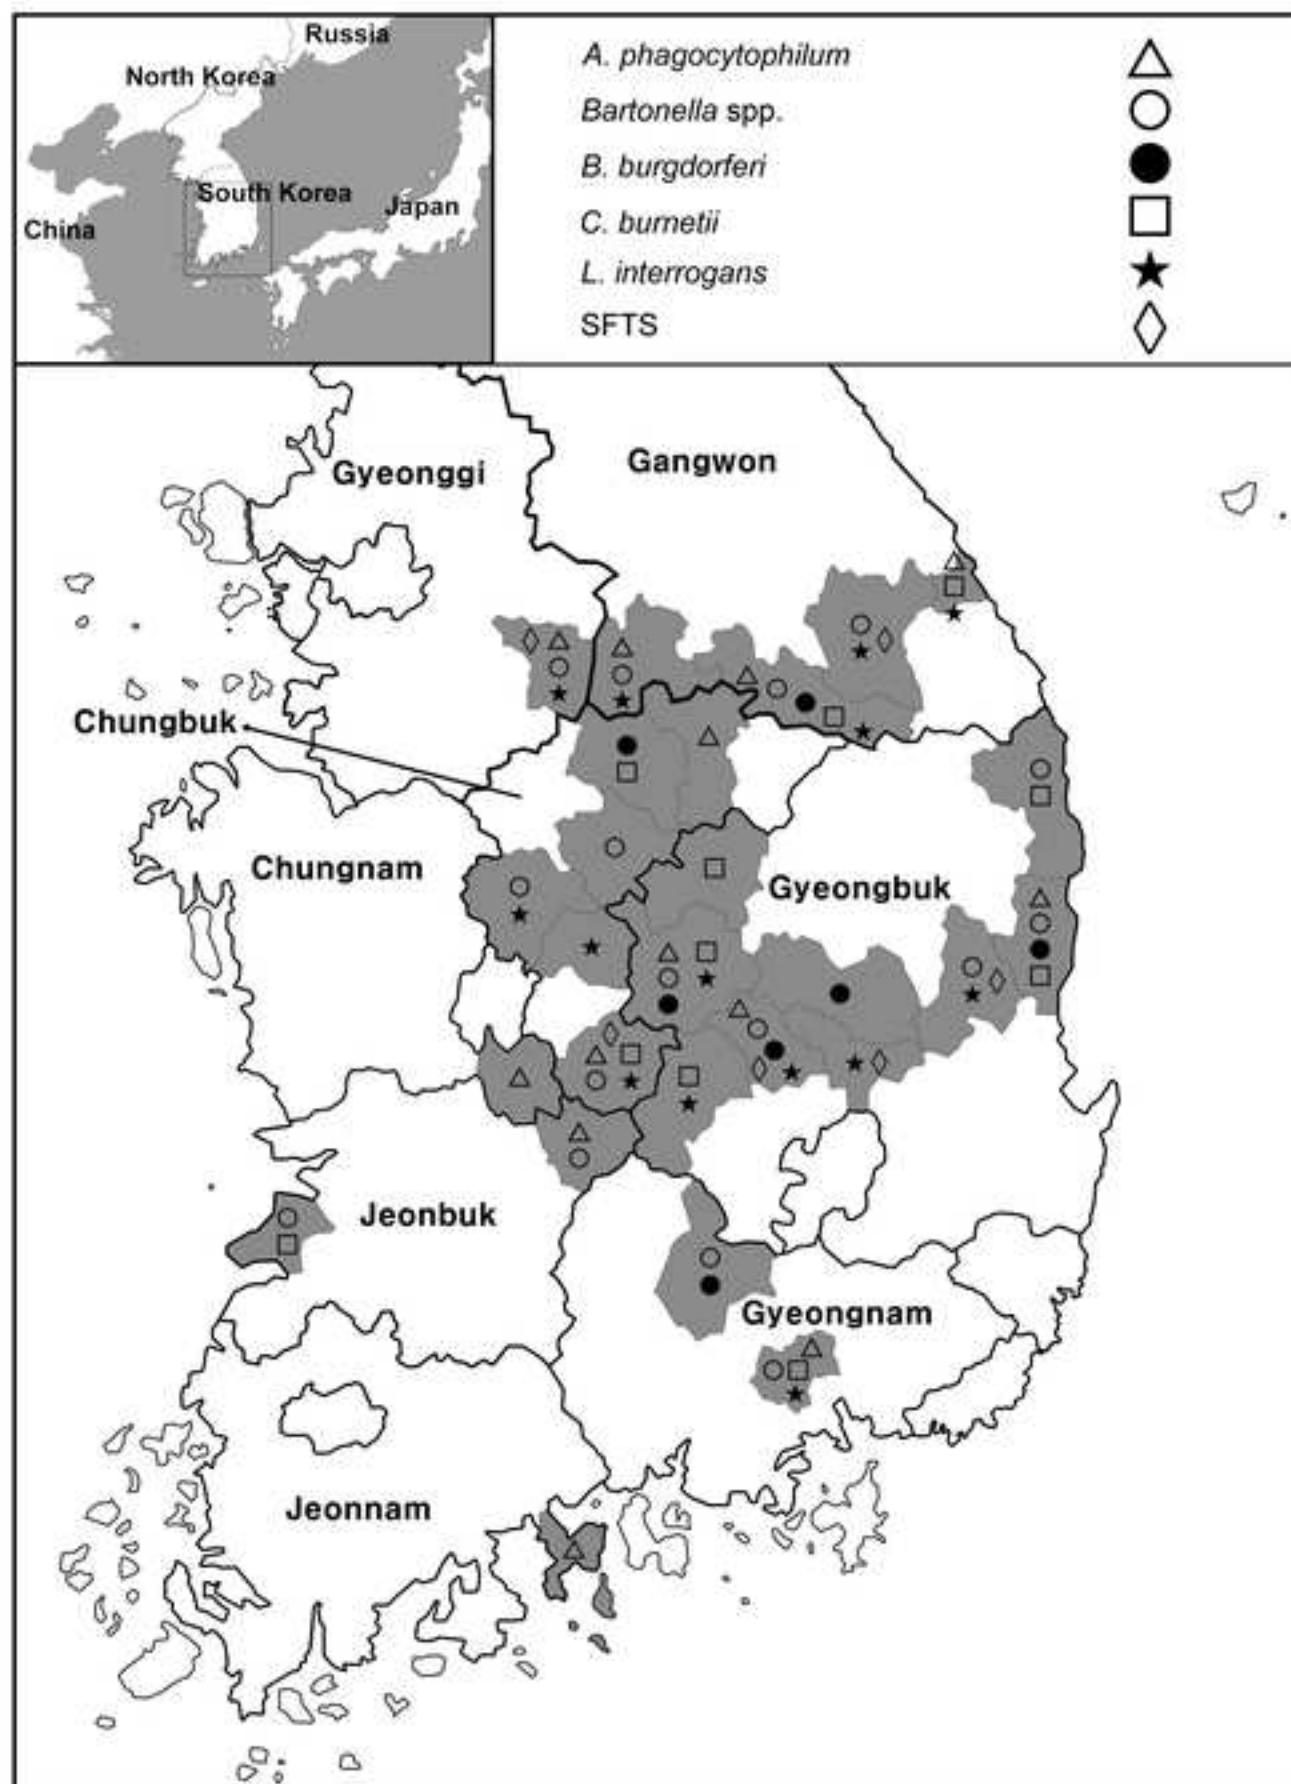

Figure 2

[Click here to access/download;Figure;Fig. 2.pptx](#)

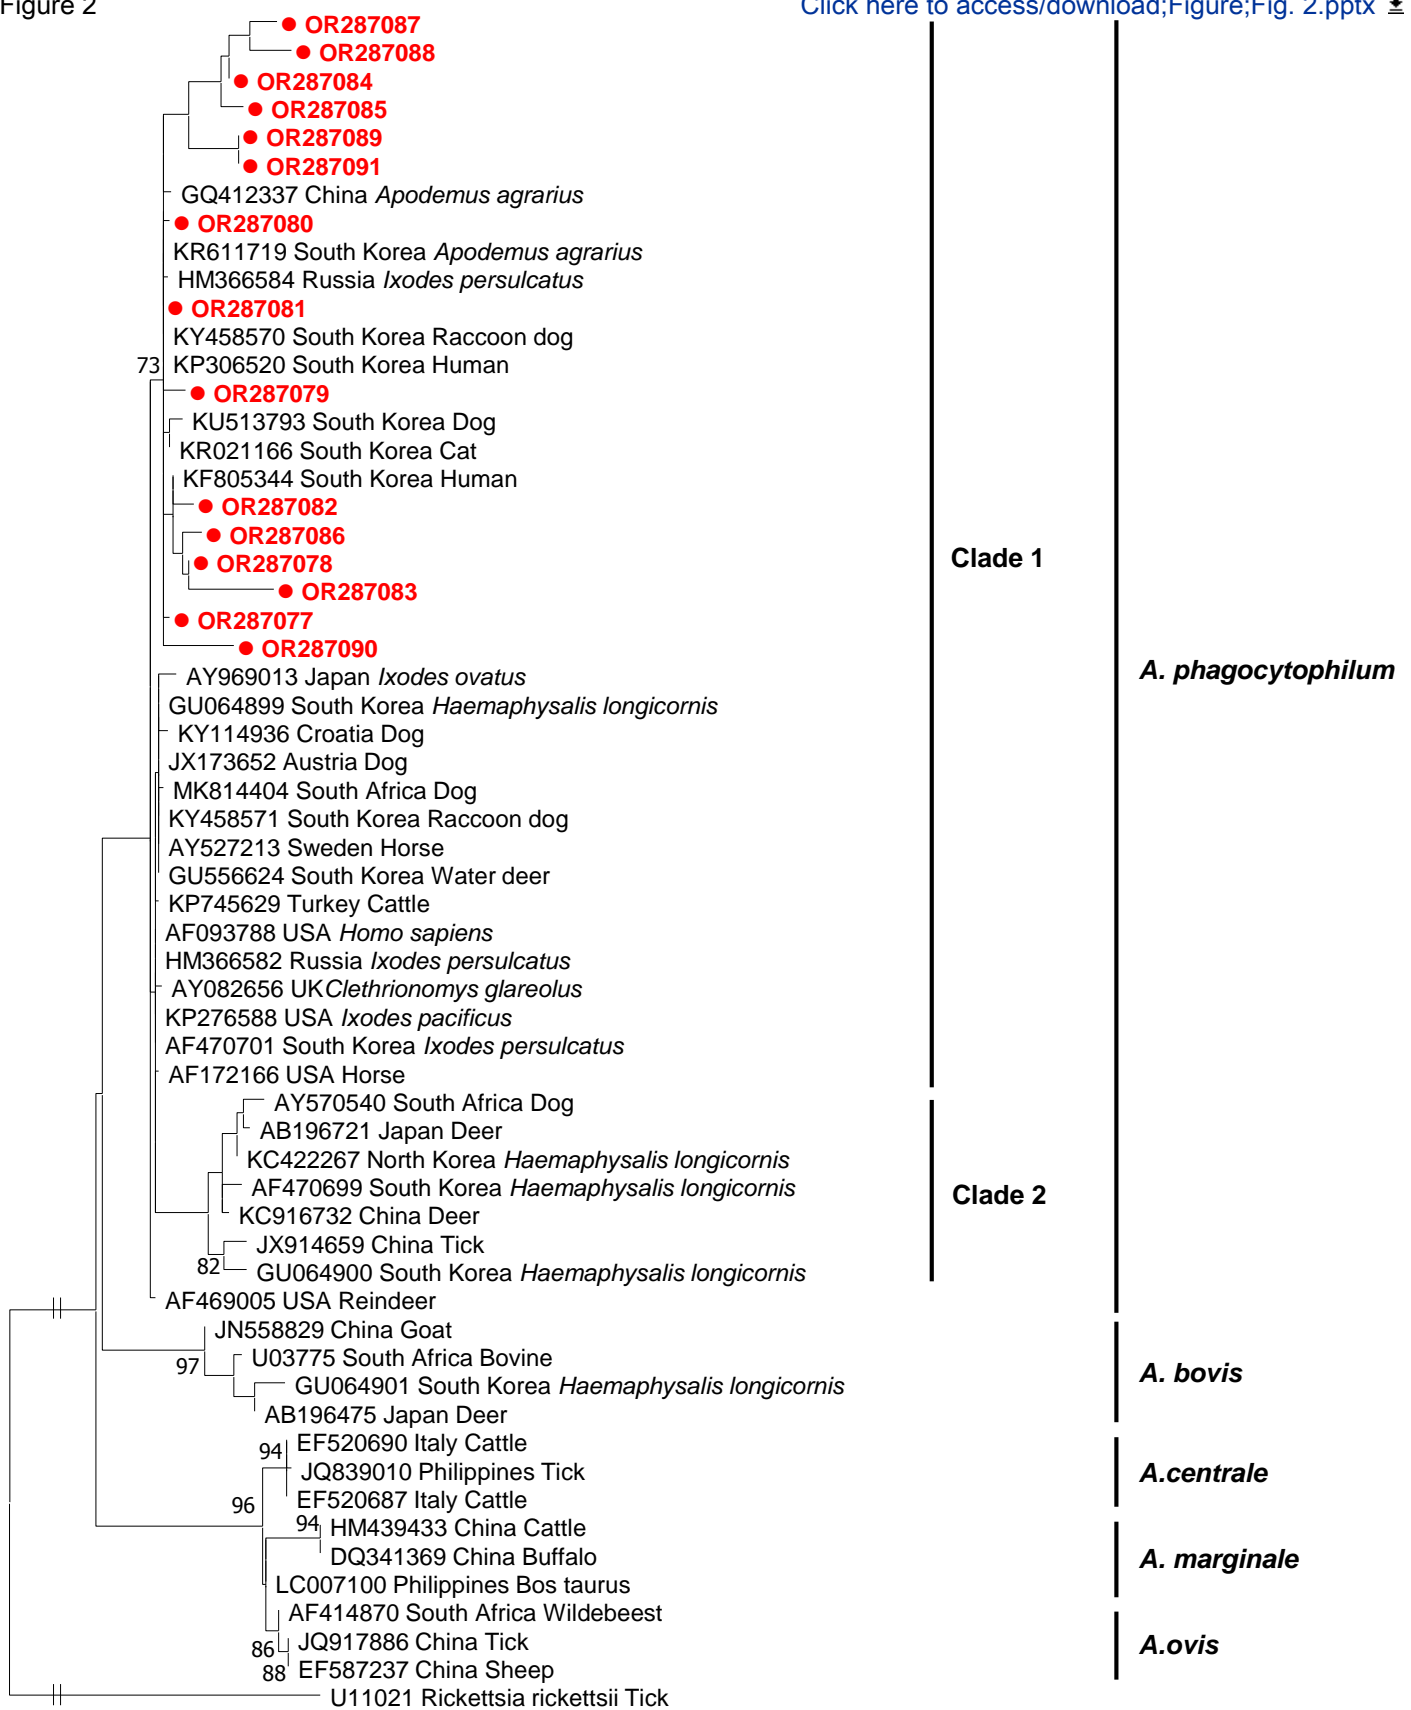

Figure 3

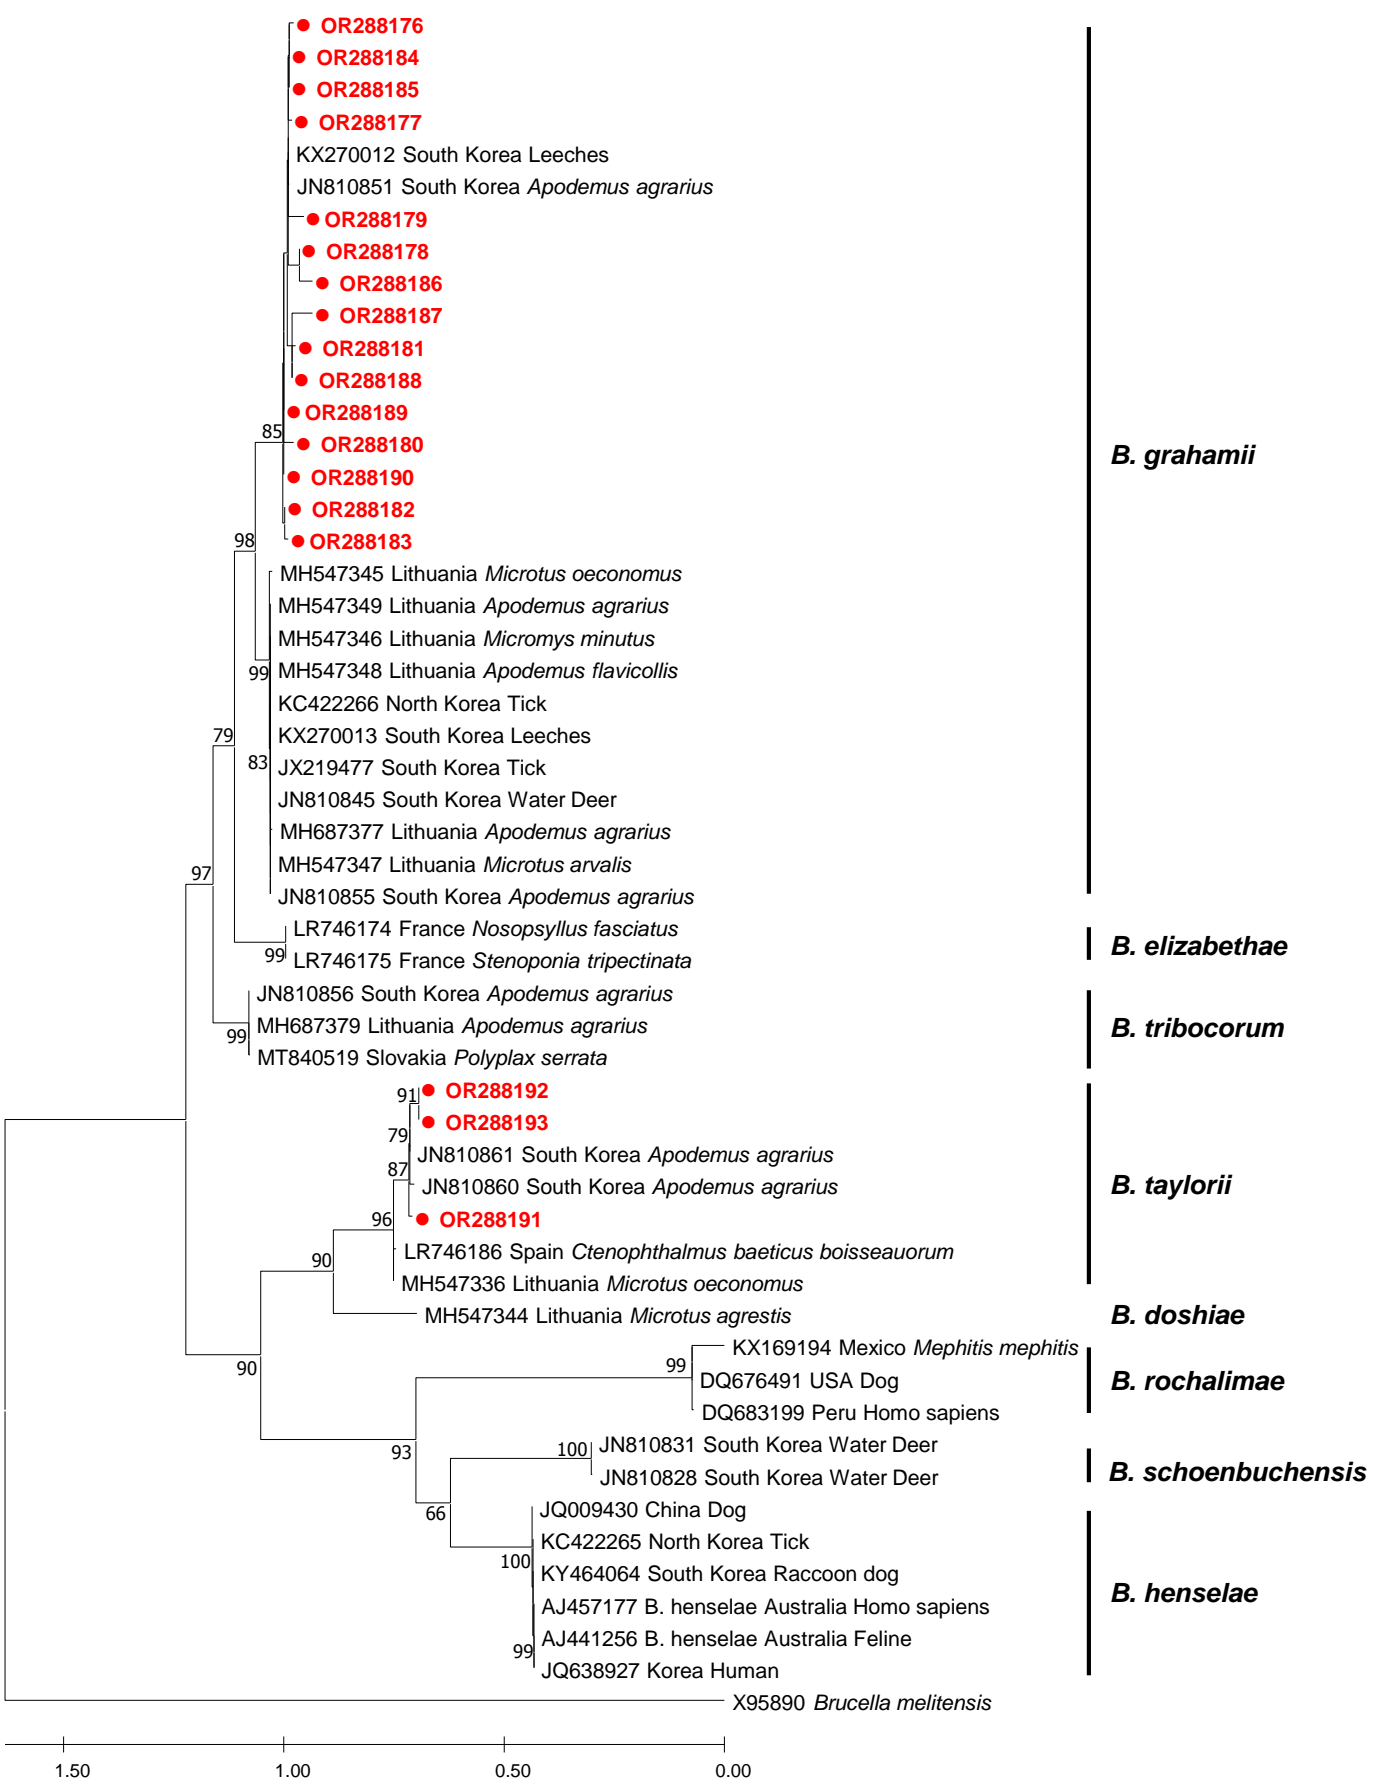

Figure 4

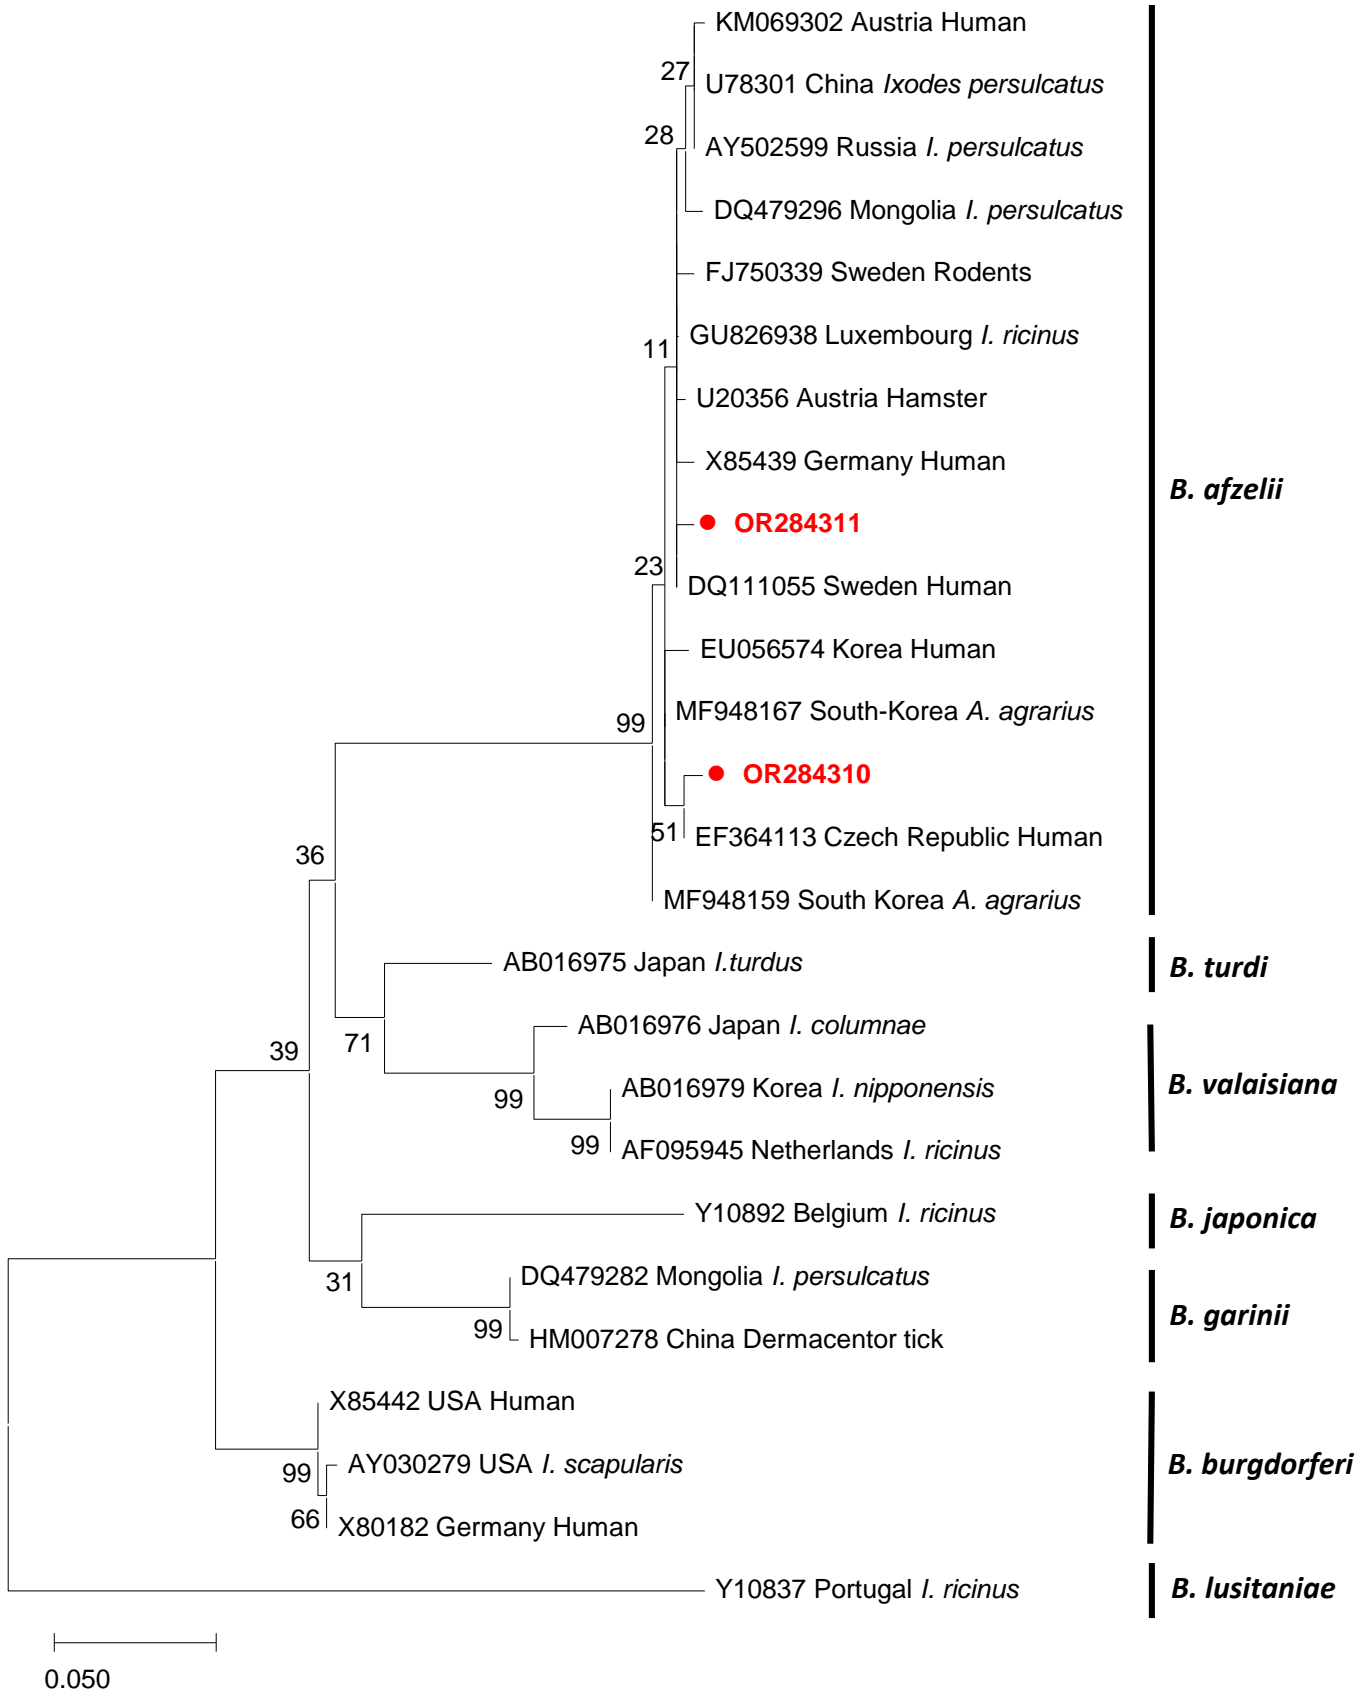

Figure 5

[Click here to access/download;Figure;Fig. 5.pptx](#)

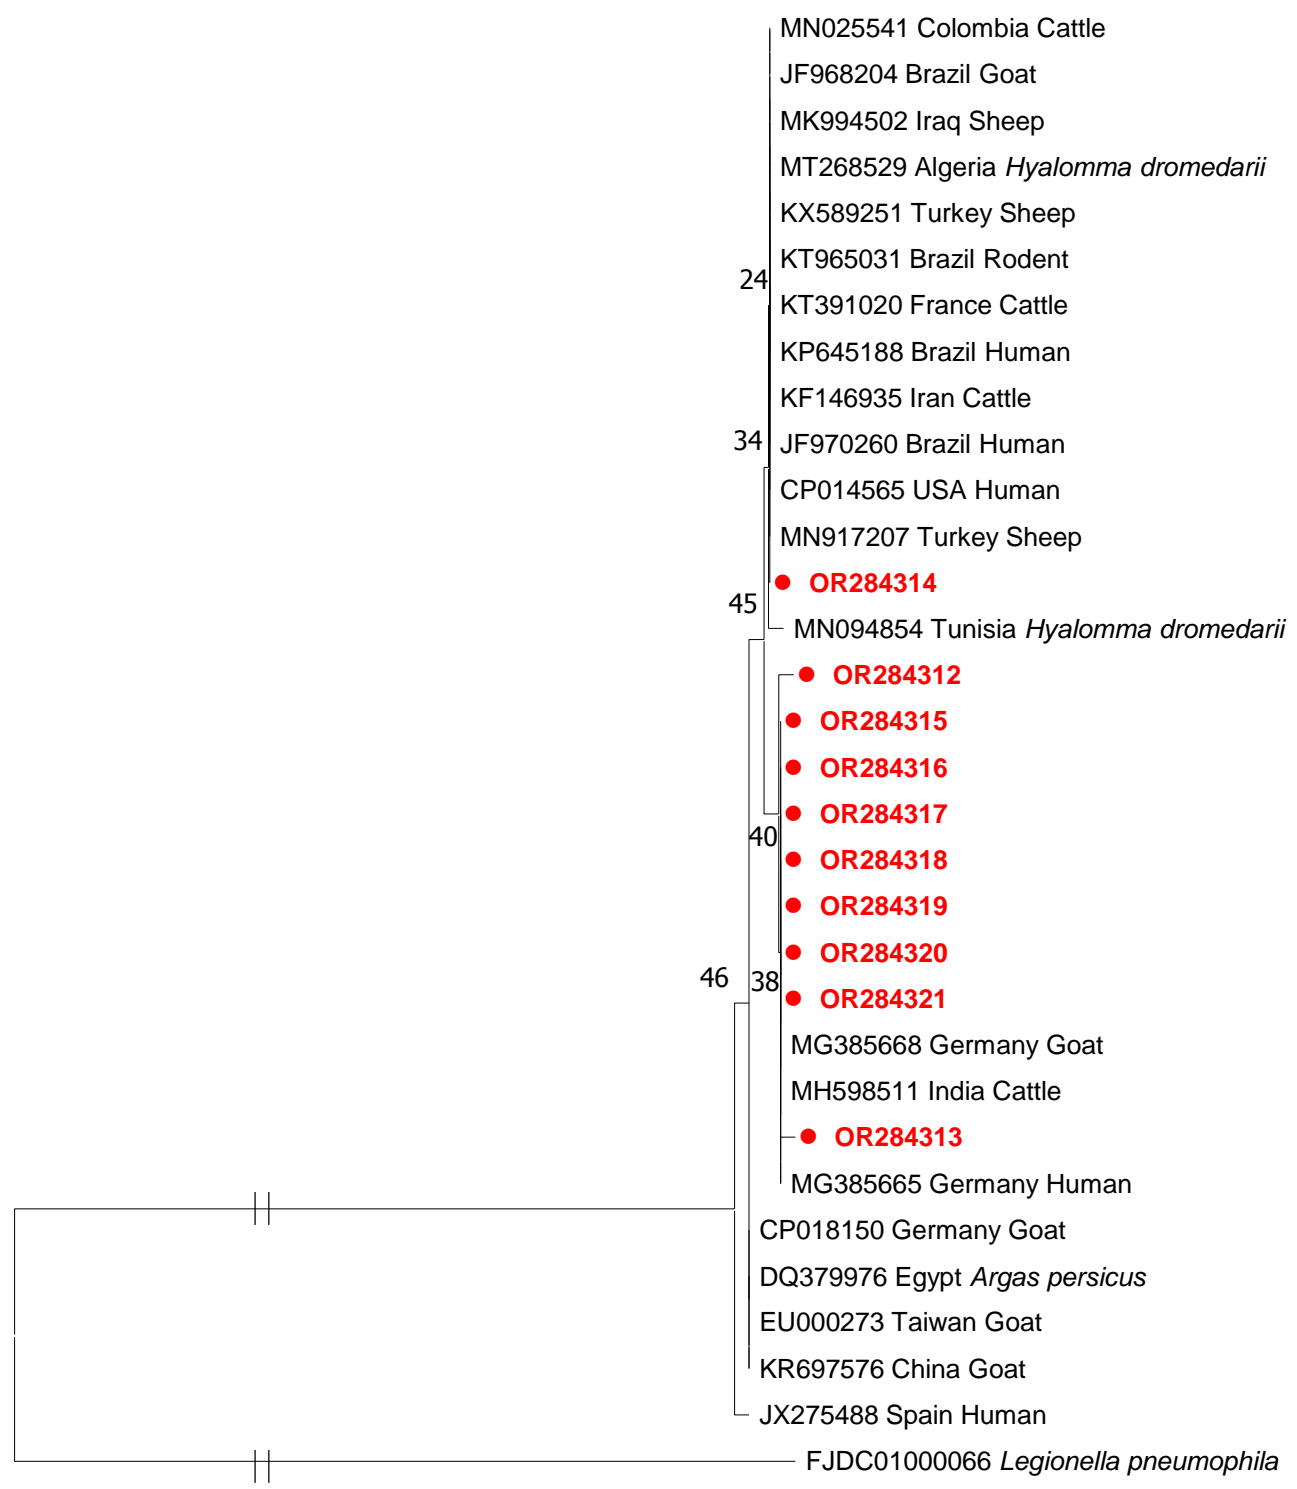

0.10



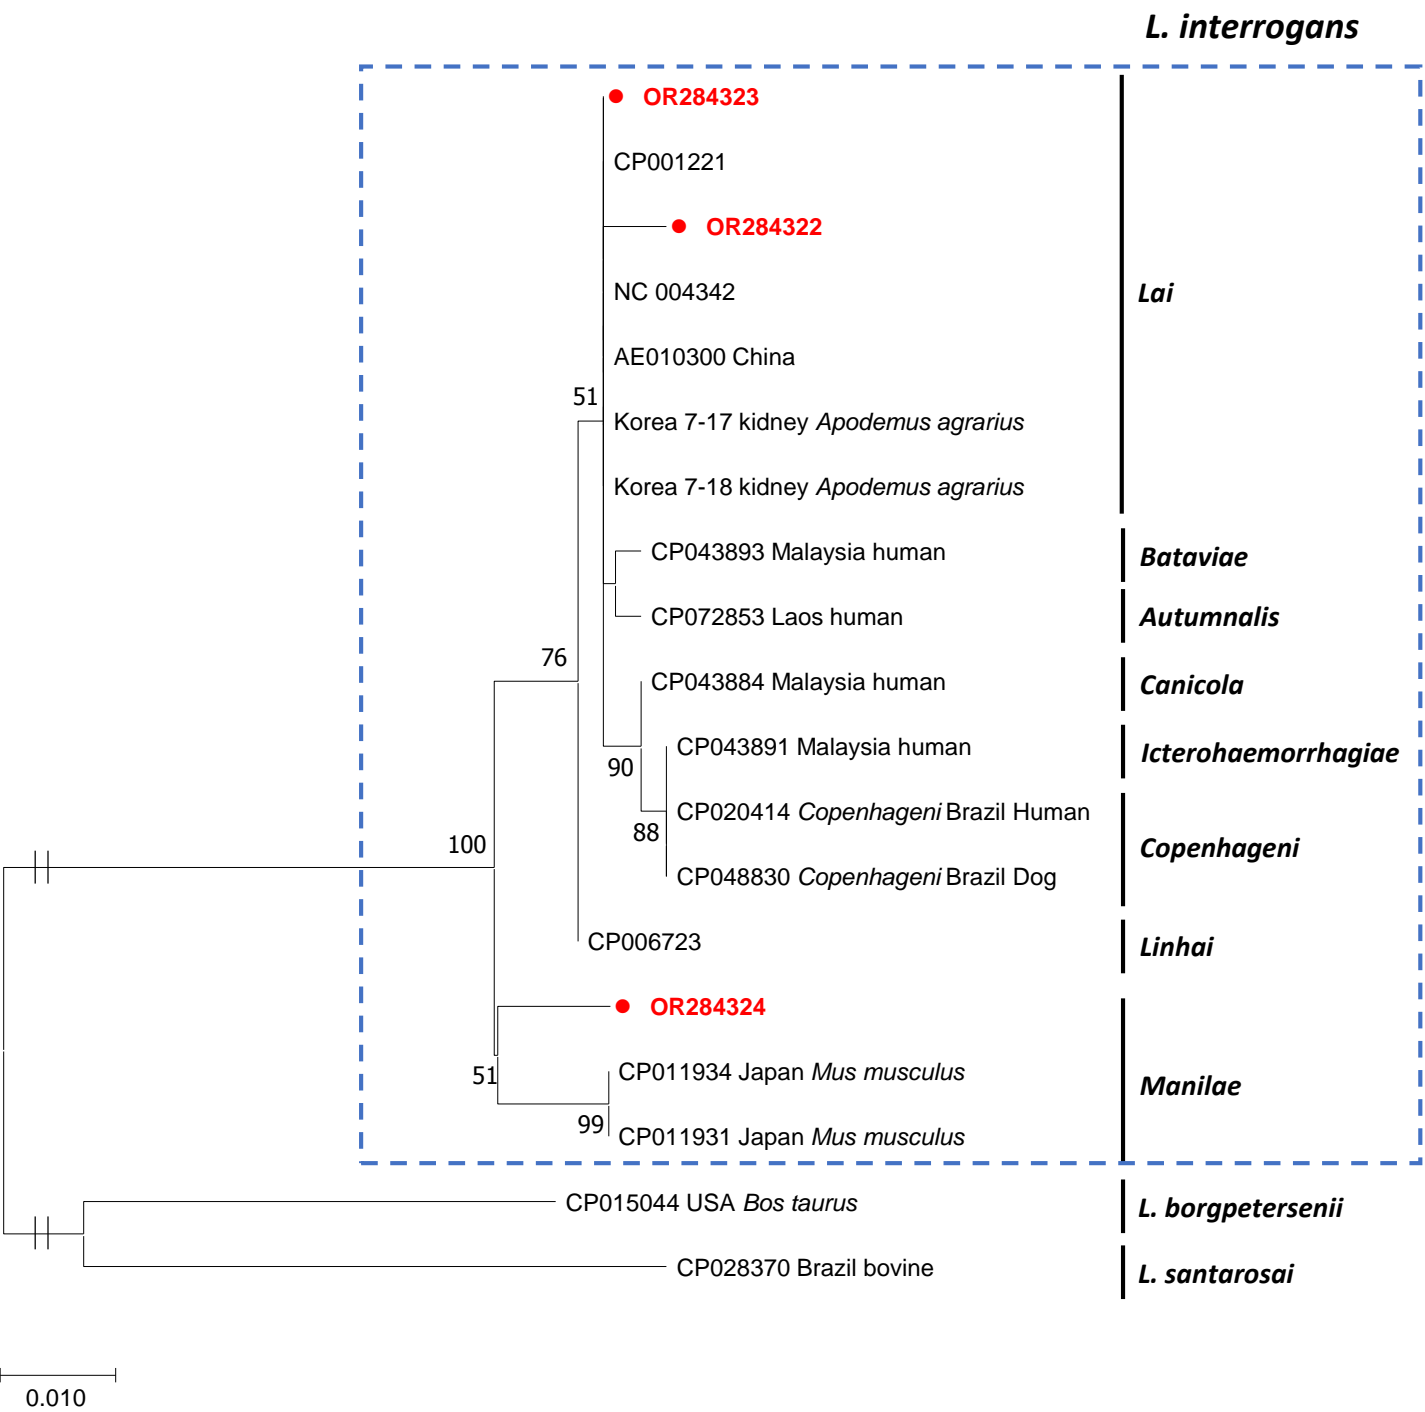

Figure 7

[Click here to access/download;Figure;Fig. 7.pptx](#)

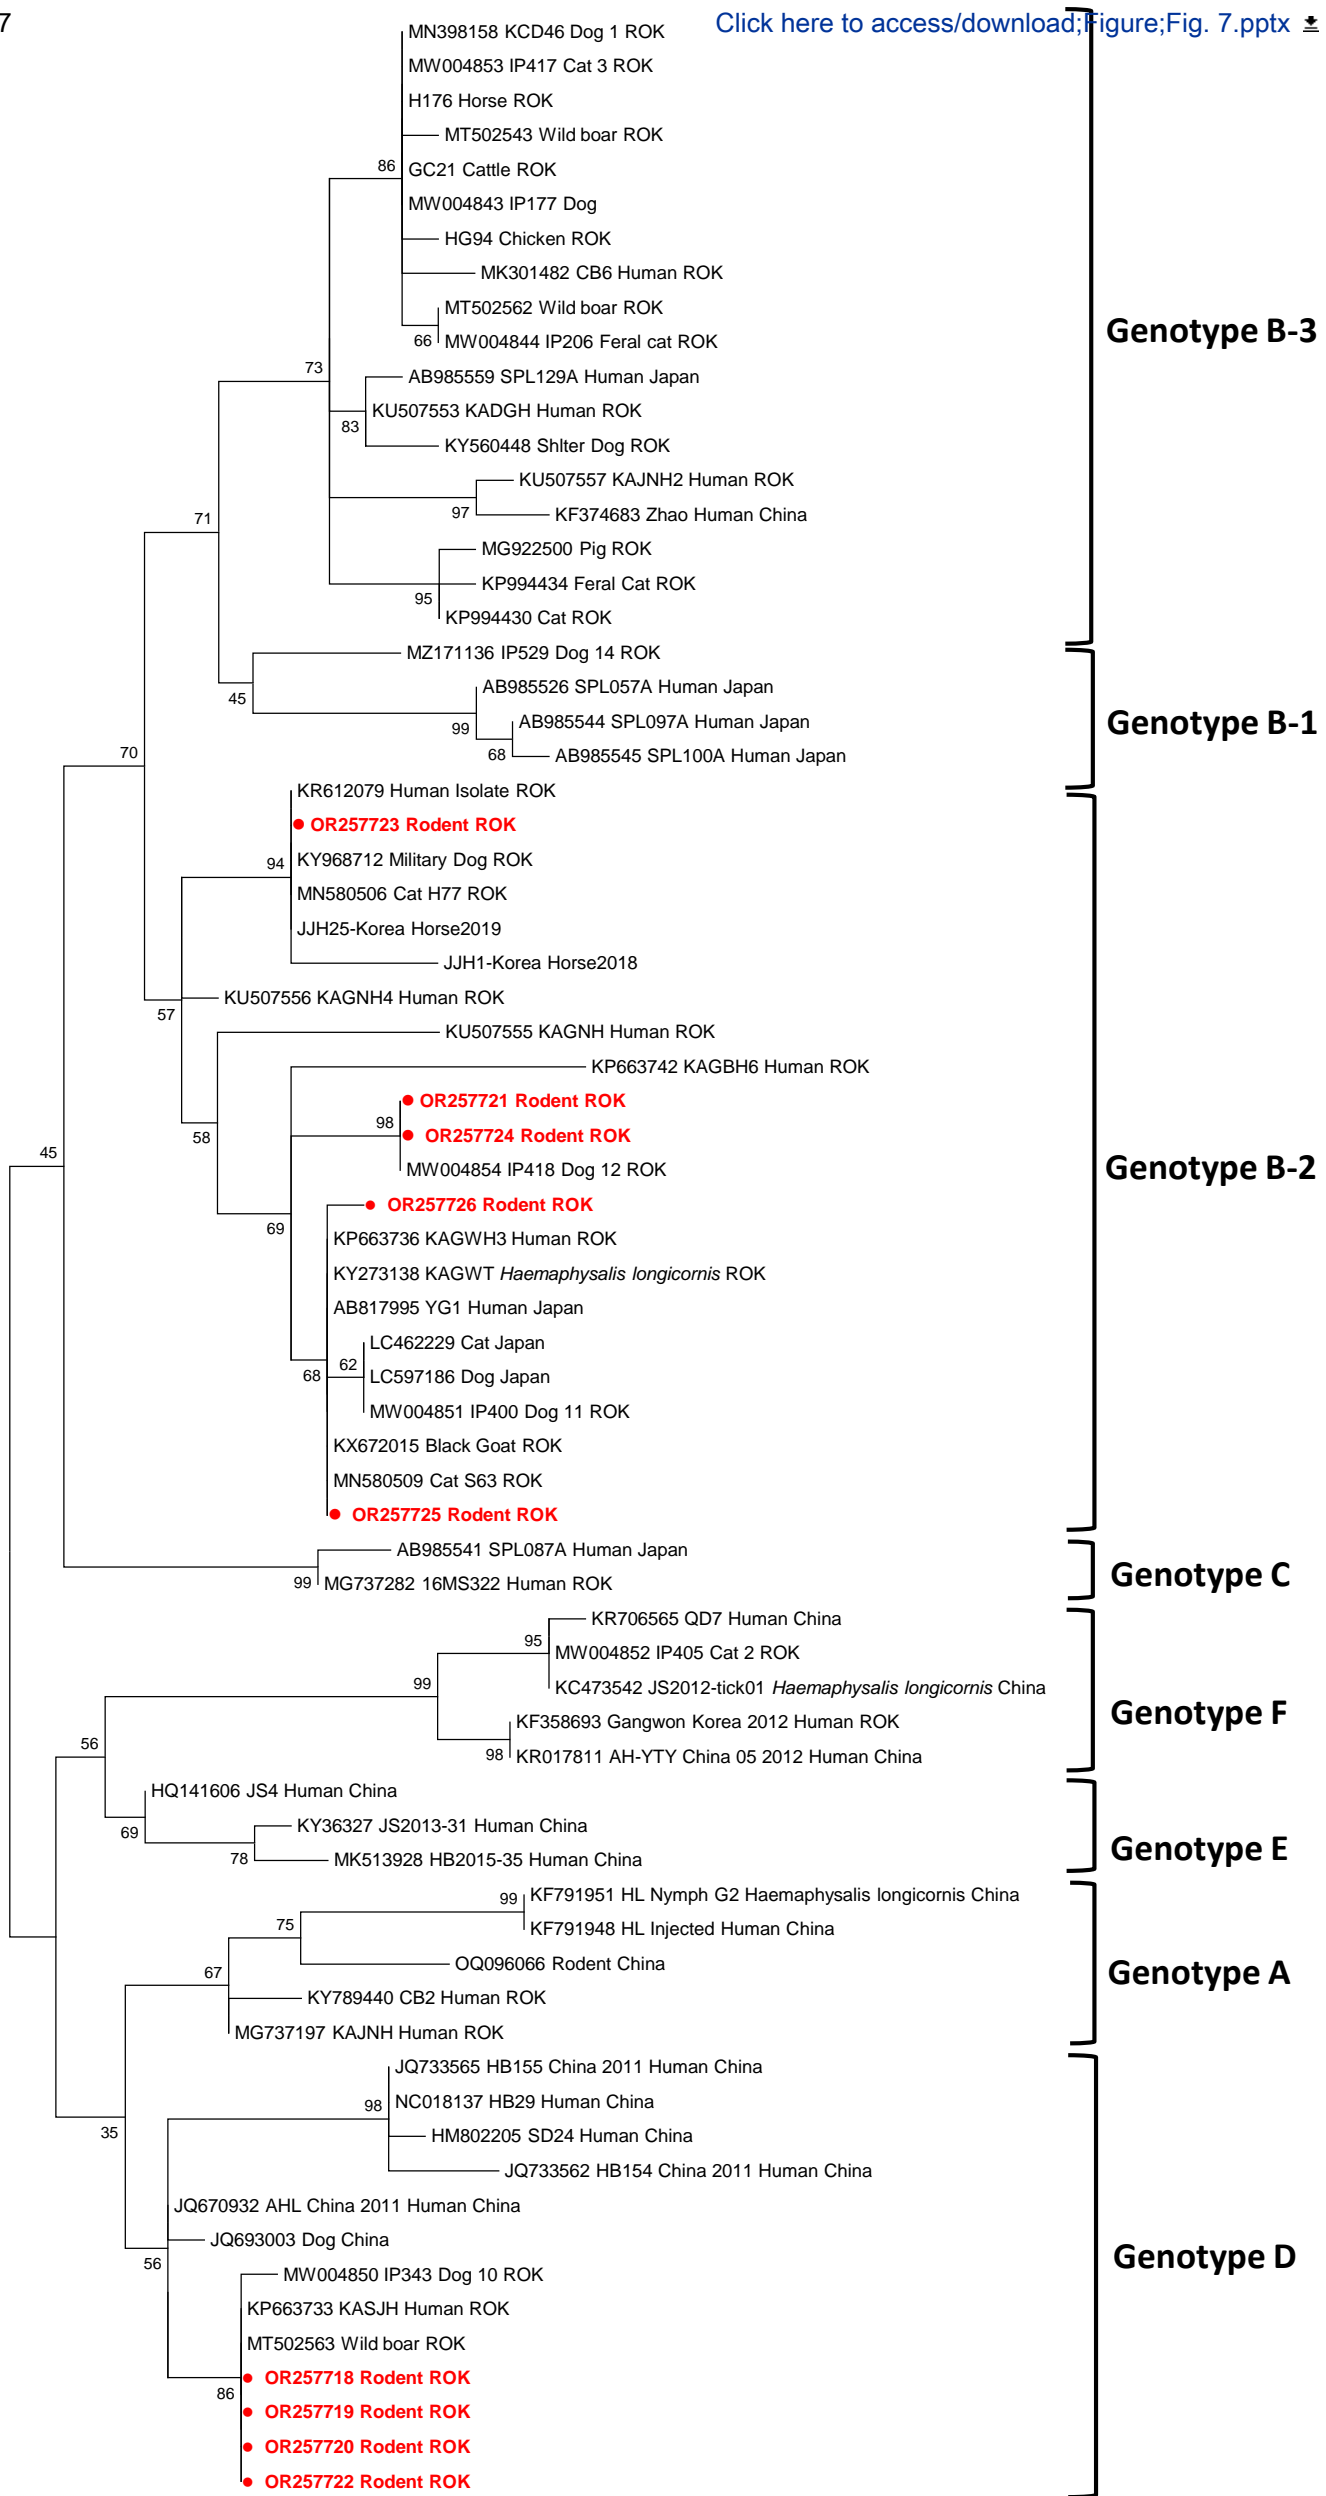

Table 1. Primer information used for PCR analysis.

| Pathogens                        | Target genes | Sequences (5'–3')                                          | Sizes (bp) | Annealing temp./Time | References             |
|----------------------------------|--------------|------------------------------------------------------------|------------|----------------------|------------------------|
| <i>Anaplasma phagocytophilum</i> | 16S rRNA     | TCCTGGCTCAGAACGAACGCTGGCGGC                                | 1433       | 50°C/30 s            | Han et al., 2019       |
|                                  |              | AGTCACTGACCCAACCTTAAATGGCTG<br>GTCGAACGGATTATTTTTATAGCTTGC | 926        | 56°C/30 s            |                        |
| <i>Bartonella</i> spp.           | ITS          | TTCAGATGATGATCCCAAGC                                       | 639        | 55°C/30 s            | Ko S 2016              |
|                                  |              | AACATGTCTGAATATATCTTC<br>CCGGAGGGCTTGTAGCTCAG              | 499        | 55°C/30 s            |                        |
| <i>Borrelia</i> spp.             | ospA         | GGGAATAGGTCTAATATTAGCC                                     | 665        | 42°C/60 s            | Priem S 1998           |
|                                  |              | CACTAATTGTTAAAGTGGAAGT<br>GCAAATGTTAGCAGCCTTGAT            | 392        | 56°C/60 s            |                        |
| <i>Coxiella burnetii</i>         | IS1111       | TATGTATCCACCGTAGCCAGTC                                     | 687        | 54°C/30 s            | Parisi A 2006          |
|                                  |              | CCCAACAACAACCTCCTTATTC<br>GAGCGAACCATTGGTATCG              | 203        | 54°C/30 s            |                        |
| <i>Leptospira interrogans</i>    | rpoB         | GTTCCAACATGCAACGYCAR                                       | 1649       | 52°C/60 s            | Bang MS 2019           |
|                                  |              | GTTGAAGGATTCRGRATAC<br>TYATGCCKTGGGAAGGWTAC                | 1023       | 56°C/30 s            |                        |
| SFTSV                            | S            | GCATRTCRTCKGACTTGATG                                       | 461        | 52°C/40 s            | Yoshikawa T et al 2014 |
|                                  |              | CATCATTGTCTTTGCCCTGA<br>AGAAGACAGAGTTCACAGCA               | 346        | 55°C/40 s            |                        |
|                                  |              | AAYAAGATCGTCAAGGCATCA<br>TAGTCTTGGTGAAGGCAT CTT            |            |                      | Oh SS 2015             |

\*SFTS: severe fever with thrombocytopenia syndrome virus

Table 2. Number of rodents captured by regions.

| Province/Species     | <i>Apodemus agrarius</i> | <i>Rattus norvegicus</i> | Unknown | Total |
|----------------------|--------------------------|--------------------------|---------|-------|
| Gyeonggi             | 12                       | –                        | 2       | 14    |
| Gangwon              | 18                       | –                        | 5       | 23    |
| Chungbuk             | 19                       | –                        | 3       | 22    |
| Chungnam<br>/Daejeon | 4                        | –                        | –       | 4     |
| Jeonbuk              | 13                       | –                        | –       | 13    |
| Jeonnam              | 4                        | –                        | –       | 4     |
| Gyeongbuk            | 76                       | 4                        | 9       | 89    |
| Gyeongnam            | 5                        | 1                        | –       | 6     |
| Total                | 151                      | 5                        | 19      | 175   |

“–”: none of rodents captured

Table 3. Number of positive samples in which pathogens were identified from captured rodents.

| Variables                          | <i>A. phagocytophilum</i> | <i>Bartonella</i> spp. | <i>Borrelia</i> spp. | <i>C. burnetii</i> | <i>L. interrogans</i> | SFTSV    |
|------------------------------------|---------------------------|------------------------|----------------------|--------------------|-----------------------|----------|
| <b>Species</b>                     |                           |                        |                      |                    |                       |          |
| <i>Apodemus agrarius</i> (n = 151) | 21                        | 72                     | 5                    | 22                 | 23                    | 9        |
| <i>Rattus norvegicus</i> (n = 5)   | –                         | 1                      | –                    | 3                  | 1                     | –        |
| Total (n = 156)                    | 21                        | 73                     | 5                    | 25                 | 24                    | 9        |
| <b>Province</b>                    |                           |                        |                      |                    |                       |          |
| Gyeonggi (n = 12)                  | 1                         | 5                      | –                    | –                  | 2                     | 2        |
| Gangwon (n = 18)                   | 4                         | 12                     | 1                    | 5                  | 6                     | 1        |
| Chungbuk (n = 19)                  | 3                         | 10                     | 1                    | 2                  | 6                     | 2        |
| Chungnam/Daejeon (n = 4)           | 1                         | –                      | –                    | –                  | –                     | –        |
| Jeonbuk (n = 13)                   | 3                         | 8                      | –                    | 3                  | –                     | –        |
| Jeonnam (n = 4)                    | 1                         | –                      | –                    | –                  | –                     | –        |
| Gyeongbuk (n = 80)                 | 7                         | 32                     | 2                    | 14                 | 6                     | 4        |
| Gyeongnam (n = 6)                  | 1                         | 6                      | 1                    | 1                  | 4                     | –        |
| Total (n = 156)                    | 21 (13.5%)                | 73 (46.8%)             | 5 (3.2%)             | 25 (16.0%)         | 24 (15.4%)            | 9 (5.8%) |

Table 4. Co-infections of two or three pathogens detected from captured rodents.

| Pathogens                                                                 | No. of positive samples |
|---------------------------------------------------------------------------|-------------------------|
| <i>A. phagocytophilum</i> + <i>Bartonella</i> spp.                        | 7                       |
| <i>A. phagocytophilum</i> + <i>Borrelia</i> spp.                          | 1                       |
| <i>A. phagocytophilum</i> + <i>C. burnetii</i>                            | 1                       |
| <i>Bartonella</i> spp. + <i>Borrelia</i> spp.                             | 2                       |
| <i>Bartonella</i> spp. + <i>C. burnetii</i>                               | 7                       |
| <i>Bartonella</i> spp. + <i>L. interrogans</i>                            | 10                      |
| <i>Bartonella</i> spp. + SFTSV                                            | 3                       |
| <i>C. burnetii</i> + <i>L. interrogans</i>                                | 2                       |
| <hr/>                                                                     |                         |
| <i>A. phagocytophilum</i> + <i>Bartonella</i> spp.+ <i>C. burnetii</i>    | 1                       |
| <i>A. phagocytophilum</i> + <i>Bartonella</i> spp.+ <i>L. interrogans</i> | 3                       |
| <i>A. phagocytophilum</i> + <i>Bartonella</i> spp.+ SFTSV                 | 2                       |
| <i>A. phagocytophilum</i> + <i>C. burnetii</i> + <i>L. interrogans</i>    | 1                       |
| <i>Bartonella</i> spp. + <i>Borrelia</i> spp. + <i>C. burnetii</i>        | 1                       |
| <i>Bartonella</i> spp. + <i>C. burnetii</i> + <i>L. interrogans</i>       | 1                       |
| <i>Bartonella</i> spp. + <i>L. interrogans</i> + SFTSV                    | 2                       |
